# Mitotic Chromosome Condensation Driven by a Volume Phase Transition

Andrew J. Beel,<sup>1†</sup> Pierre-Jean Matteï,<sup>1†</sup> Roger D. Kornberg<sup>1\*</sup>

<sup>1</sup>Department of Structural Biology, Stanford University,  
Stanford, CA 94305, USA.

<sup>†</sup> These authors contributed equally to this work.

\*Corresponding author. Email: [kornberg@stanford.edu](mailto:kornberg@stanford.edu)

**Procedures were devised for the reversible decondensation and recondensation of purified mitotic chromosomes. Computational methods were developed for the quantitative analysis of chromosome morphology in high throughput, enabling the recording of condensation behavior of thousands of individual chromosomes. Established physico-chemical theory for ionic hydrogels was modified for application to chromosomal material and shown to accurately predict the observed condensation behavior. The theory predicts a change of state (a “volume phase transition”) in the course of condensation, and such a transition was shown to occur. These findings, together with classical cytol-**

13 **ogy showing loops of chromatin, lead to the description of mitotic chromosome**  
14 **structure in terms of two simple principles: contraction of length of chromatin**  
15 **fibers by the formation of loops, radiating from a central axis; and condensa-**  
16 **tion of the chromosomal material against the central axis through a volume**  
17 **phase transition.**

18 **One sentence summary** The mitotic chromosome is an axially scaffolded ionic hydrogel,  
19 undergoing a volume phase transition to achieve a condensed state.

20 Eukaryotic chromosomes undergo several gross structural rearrangements during nuclear di-  
21 vision: they axialize (adopting a cylindrical form), they contract length-wise, and they con-  
22 dense. Axialization is thought to depend on the formation of a central proteinaceous “scaffold,”  
23 which has been convincingly demonstrated for meiotic chromosomes but remains contentious  
24 in the case of mitotic chromosomes. Length-wise contraction is thought to be explained by the  
25 formation of arrays of chromatin loops, radiating from the central axis. By contrast, the physical  
26 basis for condensation has remained obscure, as have its cellular mediators.

27 The existence of a scaffold in the center of the mitotic chromosome was proposed long  
28 ago on the basis of electron micrographs of chromosomes depleted of most proteins, dehy-  
29 drated in ethanol, and stained with uranyl acetate (1). Biochemical analysis of the scaffold  
30 suggested a rather simple composition, dominated by two proteins (2), later identified as topoi-  
31 somerase II (3) and condensin (4). The concept has received recent support from chromosome  
32 conformation capture studies of mitotic cells (5). Others, however, have argued against the ex-  
33 istence of a scaffold (6, 7). Indeed, while proteinaceous cores are readily apparent in meiotic  
34 chromosomes (8), extensive analysis by thin-section electron microscopy has failed to reveal  
35 a corresponding core in mitotic chromosomes (6). The central structure, visible only by im-  
36 munofluorescence or upon denaturation, may simply reflect the axial concentration of putative

37 scaffold components.

38 From the chromosome's central axis (proteinaceous or otherwise) radiate loops of chro-  
39 matin, as demonstrated by classical cytologic studies of lampbrush chromosomes (9) and sub-  
40 sequently by electron microscopic studies of histone-depleted mitotic chromosomes (1). The  
41 formation of such loops at least partly explains the reduction in chromosomal length during  
42 nuclear division. Loops are thought to arise through a process of "extrusion," catalyzed in an  
43 ATP-dependent fashion by condensin complexes (5, 10, 11).

44 Beyond length-wise contraction, mitotic chromatin is also condensed in volume, achieving  
45 a density of 25 percent or greater (12), comparable to the density of protein crystals. The ba-  
46 sis for this effect is unknown. Although the formation of loops achieves linear contraction, it  
47 is an inherently isopycnic process, exchanging length for width and leading to no increase in  
48 the density (viz. condensation) of the chromosomal material. Condensins, despite their name,  
49 are apparently not involved, because abrupt, auxin-mediated destruction of condensin in mi-  
50 totic cells does not prevent condensation; in the absence of condensin, the entire chromosomal  
51 material condenses into a single compact mass (13). *Linear contraction and condensation are*  
52 *evidently distinct processes.*

53 We sought to understand the basis for chromosome condensation. Our approach consisted  
54 in analyzing isolated mitotic chromosomes under various solution conditions with the use of  
55 procedures developed to quantify condensation behavior. The results were interpreted in terms  
56 of the theory of polyelectrolyte gels, giving insight into the basis for chromosome condensation.

57 **Controlled chromosome decondensation and recondensation *in vitro*** It has long been  
58 known that chromosomes expand and contract upon lowering and raising the ionic strength  
59 of the solution (14, 15). This behavior has been proposed to reflect the interconversion of  
60 chromatin between 10-nm and 30-nm fibers (16), as occurs for isolated chromatin subjected

61 to similar ionic shifts (17). While the physical chemistry of DNA and chromatin condensa-  
62 tion have been studied (18–20), a detailed physico-chemical analysis of the condensation of  
63 native chromosomes, supported by quantitative observations, is wanting. Limitations of prior  
64 work include a reliance on qualitative techniques, the observation of small numbers of speci-  
65 mens, poor demonstration of chromosome morphology, the application of condensing agents  
66 over narrow ranges of concentration, and ill-defined perturbations due to the mode of reagent  
67 delivery. We sought to overcome these limitations by the quantification of morphologies of  
68 individual chromosomes as a function of environmental variables in a high-throughput manner.  
69 We immobilized chromosomes within an optically interfaceable, parallel-plate flow cell, and  
70 after conditions for the stable adsorption of chromosomes to the objective-proximal surface of  
71 the flow cell were established (cf. Supplementary Information), chromosomes were maintained  
72 in precisely defined environments by perfusing solutions of various composition.

73 By means of this experimental system, the condensation state of chromosomes could be  
74 precisely adjusted over a wide range (Figure 1A). An advantage of this system is that, in the  
75 event of associative interactions between chromosomes and components of the solution, the free  
76 concentrations of those components are known, because perfusion is continued until chromo-  
77 some morphology ceases to change. Reduction of the ionic strength to approximately  $5 \times 10^{-3}$   
78 (molar basis) resulted in a ten-fold increase in chromosome volume (Figures 1B and S1A); in  
79 this state, water accounted for at least 90% of the volume of a chromosome. Chromosomes  
80 could be further expanded by further reduction of the ionic strength (see below).

81 Swelling and deswelling of chromosomes reflect the decondensation and recondensation of  
82 chromatin, because mass density observed in phase contrast micrographs corresponded with  
83 chromatin density observed by fluorescence microscopy of chromosomes bearing a fusion of  
84 histone 2B and green fluorescent protein (H2B-GFP) (Figure S2A). This behavior is not specific  
85 to the state of chromatin in mitotic chromosomes, as isolated nuclei exhibited similar behavior

86 (Figure S2B).

87 Chromosomes were previously swollen in solutions of elevated ionic strength (“reentrant”  
88 swelling, discussed below), and the length and width of the chromosomes were shown to vary  
89 proportionately, leading to the suggestion that swelling was isotropic (16). This result was not  
90 conclusive because the analysis was two-dimensional — the third dimension, the thickness of  
91 the chromosomes, was not determined. We obtained unambiguous evidence for isotropy by  
92 subjecting three-dimensional images of condensed chromosomes to isotropic expansion *in sil-*  
93 *ico* (Figure 1B; green) and superimposing the results upon three-dimensional images of their  
94 decondensed states (Figure 1B; magenta). The Pearson correlation coefficient between the cal-  
95 culated and observed three-dimensional images was  $0.957 \pm 0.023$  ( $n = 54$ ), demonstrating  
96 three-dimensional isotropy (Figure S1B). The reciprocal transformation (*in silico* compaction  
97 of decondensed chromosomes) gave identical results. Further support for isotropy came from  
98 an analysis of aspect ratios computed along cyclically permuted dimensions (Figure S1C), and  
99 from the centering about unity of the distribution of the ratio of aspect ratios in condensed and  
100 decondensed states (Figure 1C). The demonstration of three-dimensional isotropy was impor-  
101 tant for our subsequent studies, to assure that the adsorption of chromosomes on the surface of  
102 the flow cell did not interfere with decondensation and recondensation behavior.

103 Because intercalating dyes invariably caused chromosome condensation (Figure 2A), and  
104 because photobleaching of fluorescently labeled histone proteins limited the period of obser-  
105 vation, chromosomes were imaged as phase objects by differential interference contrast (DIC)  
106 microscopy. Computational procedures were devised for the extraction of chromosomal shapes  
107 and dimensions from DIC micrographs (Figure 2B), allowing for thermodynamic (Figure 2B,  
108 bottom left) and kinetic (Figure 1D) analyses of chromosome condensation. The results of the  
109 computational procedures were validated by manual measurements (Figure S3). The maximal  
110 and minimal degrees of condensation were operationally defined with respect to solutions pro-

111 moting nearly complete condensation or decondensation (5 mM Tris and 2 mM KCl at pH 7.5,  
112 with or without 0.375 mM spermidine, an essential polyamine known to condense DNA and  
113 chromatin (21, 22)). The swelling dynamics of thousands of individual chromosomes were  
114 quantitatively characterized in this way.

115 As noted above, observations of chromosome decondensation and recondensation have been  
116 made in the past (14–16), but quantitative evidence for morphological reversibility over repeated  
117 cycles is lacking. We also observed that chromosomes could be repeatedly decondensed and  
118 recondensed with qualitative preservation of morphology (Figure 1E), and we applied our com-  
119 putational procedures for quantitative analysis. The degree of condensation was the same for the  
120 condensed state at every cycle and for the decondensed state as well (Figure 1F). To quantita-  
121 tively assess the recovery of chromosome morphology from cycle to cycle, Pearson correlation  
122 coefficients were computed between images of chromosomes acquired during each cycle and  
123 the average images of those chromosomes in condensed (Figure 1G) and decondensed (Fig-  
124 ure 1H) states. The Pearson coefficient among all pairwise comparisons of the images of a  
125 chromosome in a condensed state obtained during the course of multiple cycles, averaged over  
126 all chromosomes, was  $0.983 \pm 0.022$ ; the corresponding value for pairwise comparison of im-  
127 ages of decondensed chromosomes was  $0.945 \pm 0.033$ . In contrast, images of condensed and  
128 decondensed chromosomes were uncorrelated ( $r = 0.198 \pm 0.118$ ). We conclude that to the  
129 resolution of our analysis, *in vitro* chromosome decondensation is reversible (at the end points  
130 of the forward and reverse processes — see below), and that the structure following reconden-  
131 sation is reflective of the native state.

132 **Chromosomes as axially-scaffolded ionic hydrogels** The decondensation of chromosomes  
133 in low salt can be attributed to the Donnan effect, whereby the abundance of negative charges  
134 of the DNA phosphates — which are only half neutralized by histone proteins (23) — attract

135 positive counterions to achieve electroneutrality; the greater concentration of counterions inside  
136 than outside the chromosome creates an osmotic pressure difference, drawing water into the  
137 chromosome. Cation-driven condensation can be explained either by suppression of the Donnan  
138 effect through elevated salt concentration, or by neutralization of the negative charge through  
139 binding of the cation to DNA (18) (or by a combination of both effects). Charge neutralization  
140 is known to be important for the condensation of naked DNA and chromatin fragments (18–20),  
141 but whether other effects are important for chromosome condensation is unknown.

142 We pursued the question of cation concentration versus cation binding by determining con-  
143 densation profiles for the family of amine compounds spermine, spermidine, putrescine, and  
144 methylamine (which bear nearly four, three, two, or one positive charges at neutral pH). No-  
145 tably, even the monovalent cation (methylamine) induced chromosome condensation (green  
146 points in Figure 3A), indicating a qualitative difference in behavior compared to naked DNA  
147 and chromatin. Quantitative analysis of hundreds of individual chromosomes perfused with  
148 solutions of these compounds disclosed the nature of the dependence of chromosome conden-  
149 sation on counterion concentration and counterion charge (points in Figure 3A). The data could  
150 be fit by binding isotherms (curves in Figure 3A). The logarithm of the effective concentra-  
151 tions exhibited a linear dependence on counterion charge (Figure 3B), and the reactions were  
152 non-cooperative (Hill coefficients of  $\sim 1$  for all counterions).

153 A fit to binding isotherms does not necessarily mean that condensation is driven by cation  
154 binding. All components of the system — chromatin, polyamines, buffer, salt, and water —  
155 must be taken into consideration in the interpretation of condensation behavior. We tested the  
156 application of a well established theory describing the swelling of a polyelectrolyte gel (24–  
157 26) which we adapted for chromatin and the components of our system. We calculated the  
158 condensation behavior predicted by the theory with parameterization determined by a Monte  
159 Carlo minimization procedure (cf. Supplementary Information), from which a subset of the data

160 (that for spermidine-driven condensation) was omitted for the purpose of cross-validation. The  
161 results recapitulated the experimental data (points in Figures 3C) when a term for the binding of  
162 polyamines was included in the calculations (solid lines in Figures 3C and 3D), but not when this  
163 term was omitted (dashed lines in Figures 3C and 3D). Cross-validation analysis demonstrated  
164 the predictive strength of the model for data excluded from fitting; specifically, the value of chi-  
165 squared, reduced by the number of observations, a measure of relative model fidelity, was 0.52  
166 for all data included in the calculations and 0.98 for the omitted subset (spermidine). The theory  
167 was predictive of chromosome condensation behavior, *formally identifying the chromosomal*  
168 *material as an ionic hydrogel.*

169 The three polyamines spermine, spermidine, and putrescine were effective at concentrations  
170 orders of magnitude below that required for suppression of the Donnan effect (a concentration  
171 comparable to that of unneutralized DNA phosphate, estimated to be on the order of 0.2 M),  
172 and their effect was almost entirely explained by binding. The mode of binding, which is not  
173 specified by our model, is presumably that of counterion condensation, as shown for the con-  
174 densation of DNA (27) and chromatin fragments (20). Contrary to the behavior of multivalent  
175 cations, deswelling driven by monovalent cations, exemplified by methylamine (green points in  
176 Figure 3C), occurs at a concentration comparable to that of unneutralized DNA phosphate. Fur-  
177 thermore, the predicted behavior was largely unchanged by omission of the term for counterion  
178 binding (compare solid and dotted green lines in Figure 3C). Condensation driven by mono-  
179 valent cations thus reflects suppression of the Donnan effect, with a lesser contribution from  
180 binding. Chromosomes adopt an intermediate degree of condensation at physiologic concentra-  
181 tions of monovalent salt (Figure 3A), so more or less condensed states may occur, depending  
182 on the conditions of the cellular milieu.

183 The re-swelling of chromosomes observed with progressively higher concentrations of methy-  
184 lamine (dashed line in Figure 3A), which reproduces the effect of high concentrations of mag-



185 nesium chloride (15), can be interpreted as reentrant swelling, a common attribute of gels (28).  
186 Spermine induced re-swelling at a lower concentration than methylamine but at the same ionic  
187 strength (Figure 3E), demonstrating that, unlike condensation (Figure 3A), which is a func-  
188 tion of counterion concentration, reentrant decondensation is a function of the solution ionic  
189 strength. Two regimes of counterion concentration were thus apparent: low concentrations,  
190 where charge neutralization drives condensation, and high concentrations, where charge screen-  
191 ing drives reentrant decondensation. (There is in fact a third regime, whose properties are de-  
192 scribed below.)

193 Our calculations (Figure 3C) assume only that chromosomes are polyelectrolyte gels (all  
194 lines in Figure 3C) and that chromosomal charge can be neutralized by multivalent cations  
195 (solid lines in Figure 3C). The amount of charge borne by a cation, however, is not the only  
196 important factor, as quantitative differences were observed for cations having the same amount  
197 of charge but different spatial distributions thereof (Figure S5A). Such ion-specific effects are  
198 consistent with predictions from atomistic molecular dynamics calculations of the condensation  
199 of counterions around a polyelectrolyte (29), as well as with differences in the effectiveness of  
200 spermidine and hexaminecobalt(III) chloride on DNA condensation (27). More highly con-  
201 centrated charge was associated with greater effectiveness, which could reflect the correlation  
202 between smaller ionic radii and shorter DNA persistence lengths (30).

203 Besides neutralization, the effects of multivalent cations on DNA and chromatin have been  
204 attributed to other processes such as charge inversion and counterion-induced inter-DNA attrac-  
205 tion. These phenomena occur at much higher counterion concentrations than those tested by our  
206 experiments; for instance, charge inversion of DNA is induced by  $\sim 1$  mM spermine at an ionic  
207 strength of  $\sim 0.01$  (31), and attractive inter-DNA forces appear at magnesium concentrations  
208 between 10 and 50 mM (32). Therefore such effects cannot explain the overall behavior shown  
209 in Figure 3A.

210 The identification of chromosomal material as an ionic hydrogel does not explain the cylin-  
211 drical shape of chromosomes. A gel formed by the coalescence of polymer chains in the absence  
212 of constraints would be expected to be approximately spherical. The breaking of spherical sym-  
213 metry may be attributed to a central filament, which became apparent upon decondensation  
214 of chromosomes (Figure 3F, left). This filament presumably represents the “scaffold” — first  
215 demonstrated in electron micrographs as a remnant of denatured chromosomes (*I*), and seen  
216 here for the first time in intact form in the native state, without the use of stains. Identifica-  
217 tion of the filament as the scaffold was supported by immunofluorescence microscopy, which  
218 revealed extensive colocalization with putative scaffold components, including condensin I and  
219 topoisomerase II $\alpha$  (Figures 3G and S4A).

220 The scaffold could be released from chromosomes by controlled nuclease digestion (Fig-  
221 ures 3H and S4B). The scaffold expanded and contracted along with the surrounding chromatin  
222 before digestion (Figure S4C), but it lost this capacity after nuclease digestion (Figure S4B),  
223 apparently reflecting the transmission of tensile forces from the chromatin. This possibility is  
224 further supported by the isotropic nature of chromosome expansion (Figures 1B and S1), im-  
225 plying the application of equal and opposite forces on the scaffold by the expanding chromatin  
226 network. Upon removal of chromatin, the scaffold exhibited striking flexibility, undergoing  
227 rapid, thermally driven, conformational fluctuations (Movie S1). Such flexibility may be im-  
228 portant, for example, for bending of chromosomes at the centromere while under tension from  
229 kinetochore-attached microtubule fibers.

230 On the basis of these observations, the morphology of the mitotic chromosome *may be sim-*  
231 *ply explained by the collapse of a chromatin gel against a central axis*; the electrostatic potential  
232 energy of the excess charge, which concentrates at the surface of a gel (33), is minimized by  
233 cylindrical geometry. The range of condensation states observed over a broad range of cation  
234 concentration, irrespective of cation charge (Figures 1A and 3A), need not be ascribed to the

235 interconversion of 10-nm and 30-nm chromatin fibers, as previously assumed (16), and can  
236 instead be explained simply by a more or less extended configuration of the chromatin fibers  
237 (Figure 3F, right).

238 Partial decondensation of chromosomes also led to the appearance of pairs of centrally lo-  
239 cated dots, attributed to kinetochores (Figure S4D). Their identity was confirmed by immuno-  
240 staining with antibodies directed against CENP-A (Figure S4E), a component of the kinetochore  
241 inner plate (34). Ordinarily invisible by phase imaging, kinetochores were revealed by lowering  
242 the refractive index of the chromatin background. Unlike chromatin and scaffold, kinetochores  
243 showed no tendency to expand or contract with change of environment (Figure S4F), consistent  
244 with their capacity to withstand large forces from the spindle apparatus during chromosome  
245 segregation (35).

246 **Confirming the identification of chromosomes as ionic hydrogels** In the theory of poly-  
247 electrolyte gels, the principal determinants of gel volume (shown schematically in Figure 3F)  
248 are the free energies of mixing, chain elasticity, and ion partitioning (24). Derived from these  
249 free energies are osmotic pressures which drive uptake or expulsion of solvent; when these pres-  
250 sures balance, the volume of a gel ceases to change. Knowledge of these determinants leads  
251 to testable predictions by which the identification of chromosomes as ionic hydrogels can be  
252 confirmed. Such predictions include the dependence of swelling behavior on the pH, the ionic  
253 strength, the Flory-Huggins parameter, and the relative permittivity of the solvent.

254 Chromosomes are acidic, and the swelling of an acidic hydrogel is expected to be enhanced  
255 in alkaline environments and reduced in acidic ones, an expectation that was confirmed by vari-  
256 ation of pH (Figure S5B). The dependence on pH reflects a change in the ionization state of  
257 chromatin, but the ionizable groups have not been identified. Inasmuch as the pKa of DNA  
258 phosphates is around 0, the pH dependence most likely reflects the ionization state of the his-

259 tones (36) or that of ring nitrogens of adenine and cytosine (37). The chromosome-condensing  
260 activities of multivalent cations, such as polyamines, and of acids, act through a common mech-  
261 anism, namely the reduction of chromosomal “fixed charge” density. Reduction is accomplished  
262 noncovalently by multivalent cations (through counterion condensation) and covalently by acids  
263 (through protonation of chromatin).

264 A counterintuitive prediction of theory (25) — borne out by our calculations for chromo-  
265 somes (curve in Figure 3I) — is that an ionic hydrogel, which swells upon lowering the ionic  
266 strength, will deswell when the ionic strength is lowered further still. Indeed, chromosomes  
267 attained a maximally decondensed state at a molar ionic strength of  $\sim 10^{-3}$ , from which point  
268 *condensation could be achieved by further lowering of the ionic strength as well as by raising*  
269 *it* (points in Figure 3I). Condensation at very low ionic strength derives from an ion-exchange  
270 process: as the salt concentration is reduced, hydronium ions are increasingly recruited as coun-  
271 terions. Through protonation of acidic groups, the incoming hydronium ions reduce the fixed  
272 charge density of the gel (at an ionic strength determined by the pKa of the gel), thereby de-  
273 priving the gel of the counterions required for it to swell. Counterion-mediated chromosome  
274 condensation can therefore be divided into three concentration regimes, each dominated by  
275 a different mechanism (Figure 3J). In the first regime, a proton-counterion exchange process  
276 shifts the pH of the chromosomal interior toward neutrality, thereby endowing the chromosome  
277 with fixed charge as a result of acid-dissociation reactions. In the second regime, the degree of  
278 fixed charge is decreased by an associative process between counterions and charged moieties  
279 along the chromosome (with a contribution from the suppression of the Donnan effect which is  
280 negligible for all but monovalent cations). In the third regime, there is strong screening of the  
281 fixed charge (a short Debye length) and a disruption of chromosome-counterion interactions.

282 Gel theory also predicts a dependence of the degree of swelling on the thermodynamic qual-  
283 ity of the solvent. The impact of solvent quality on the free energy of polymer-solvent mixing is

284 quantified by the Flory-Huggins parameter ( $\chi$ ), whose value is determined by the relative ener-  
285 getic strength of heterotypic (polymer-solvent) and homotypic (polymer-polymer and solvent-  
286 solvent) interactions. Water, with a sufficient concentration of dissolved ions (Figure 3I), is a  
287 good solvent for chromatin. Higher values of  $\chi$ , which favor less swollen states, are expected  
288 for less polar solvents. This prediction was confirmed by immersing chromosomes in the poly-  
289 ols glycerol and 2-methyl-2,4-pentanediol: the degree of condensation increased inversely with  
290 solvent polarity (Figures S5C and S5D).

291 The Bjerrum length — the length scale at which the electrostatic energy between two ele-  
292 mentary charges reaches parity with thermal energy — is inversely proportional to the dielectric  
293 constant. Reduction of the dielectric constant therefore facilitates ion pairing, and is expected to  
294 enhance polyamine-driven condensation of chromosomes. To test this prediction, the dielectric  
295 constant was varied by mixing water ( $\epsilon = 78.3$  at 298.15 K) and glycerol ( $\epsilon = 42.5$ ) in vary-  
296 ing proportions. Accordingly, the potency of spermidine increased inversely with the dielectric  
297 constant, and was greater by an order of magnitude in nearly pure glycerol compared to aqueous  
298 solution (Figure S5E).

299 **Chromosome condensation as a volume phase transition** Gels are a phase of matter formed  
300 by the coalescence of sols and stabilized by some means of cross-linking. In addition to the  
301 sol-gel phase transition, gels themselves undergo thermodynamic phase transitions, predicted  
302 by classical theory (38) and verified experimentally (39). Known as volume phase transitions  
303 (VPTs), they are observed under certain conditions of the gel and solution.

304 Hysteresis is a common signature of first-order phase transitions (40), and reflects the co-  
305 existence of two phases in different proportions along the forward and reverse directions of  
306 a phase transition. Hysteresis of gel volume, reflective of a VPT, is predicted by the theory  
307 under certain solution conditions: the calculated condensation curves develop an S-shaped in-

308 flection, which may resolve as a hysteresis loop because of the thermodynamic instability of  
309 states lying along the loop. Consistent with theoretical expectation, hysteresis was observed  
310 in condensation-decondensation curves of chromosomes, produced by variation of spermine  
311 concentration (Figure S6A) and pH (Figure 4A). The time over which spermine concentration  
312 and pH were varied was long in relation to the relaxation time of the system (Figure S6B); the  
313 hysteresis loops therefore reflect the occurrence of metastable states (41). Chromosome con-  
314 densation evidently has the properties of a bistable system. The occurrence of a VPT does not  
315 require a change in the ionic milieu. At physiologic ionic strength, our calculations predict a  
316 VPT driven by an increase in the Flory-Huggins parameter (Figure S7).

317 Hysteresis of the chromosomal material can be understood through an analysis of the free  
318 energy of a chromosome modeled according to polyelectrolyte gel theory. The dependence of  
319 the free energy on the polymer volume fraction shows local minima for condensed and decon-  
320 densed states (filled and open circles, respectively, in Figure 4B, upper panel). These local  
321 minima shift as the pH is raised or lowered (trajectories of filled and open circles), and ul-  
322 timately disappear at different points for condensation and decondensation. Continuation of  
323 the trajectories of the minima beyond such points results in unstable states (dotted circles in  
324 Figure 4B, upper panel), which will be driven to the opposing state through a phase transition  
325 (dotted lines in Figure 4B, lower panel). Because the forward and reverse transitions occur at  
326 different pH, a hysteresis loop is formed. Preceding the discontinuities (dotted lines in Fig-  
327 ure 4B, lower panel) is a metastable regime, characterized by the presence of two local minima,  
328 from which earlier states may be reached by reversal of the system's trajectory. Alternatively,  
329 thermal fluctuations may culminate in a phase transition, after which return along the same path  
330 becomes impossible (for more detail, see the legend for Figure 4B). Consistent with this ac-  
331 count, much of the swelling process exhibited approximate reversibility of path (red curve in  
332 Figure 4A), with the reverse path falling within the scatter of the forward path; beyond a certain

333 point, however, path reversal was no longer observed, resulting in a hysteresis loop (blue and  
334 black curves in Figure 4A). Notably, the threshold of irreversibility occurs at a degree of con-  
335 densation similar to that of chromosomes in physiologic monovalent salt solutions (compare  
336 Figure 4A with Figures 3A [green curve] and 3I), indicating that chromosomes may naturally  
337 reside in a condensation state near that of the VPT, such that small fluctuations in the ionic  
338 milieu could drive a phase transition.

339 The observation of hysteresis shows that contrary to appearances, condensation is a thermo-  
340 dynamically irreversible process (42, 43); the appearance of reversibility (Figure 1E-H) depends  
341 upon returning to a point beyond the lower or upper closure points of the hysteresis loop. The  
342 absence of a break in the curve, as would be expected from a concerted change in state of the en-  
343 tire system, is explained by heterogeneity of the material (discussed below). The chromosomal  
344 phase transition was apparent macroscopically by the sudden opacification of chromosomes in  
345 suspension upon addition of spermidine (Figure 4C).

346 Further evidence for a VPT came from the observation of phase coexistence — theoretically  
347 attainable within the zone bounded by binodal and spinodal lines — at low polyamine concen-  
348 tration (Figure 4D). Beginning from a phase-separated state, movement of the phase boundary  
349 was observed upon flowing solution favoring one of the two phases, resulting in the growth of  
350 that phase at the expense of the other (Figure 4E). *We conclude that chromosome condensation*  
351 *involves a volume phase transition of the chromosomal hydrogel.*

352 We note that a VPT is a reflection of the coil-globule transition of the polymer component of  
353 a gel (44). An intramolecular coil-globule transition has been observed for DNA in the presence  
354 of trivalent cations (45, 46). Therefore, the long-studied condensation of DNA and chromatin  
355 fragments manifests as a VPT when assembled into a network (Figure 4F).

356 **Macromolecule-driven condensation** The excluded volume effect is known to play a role in  
357 the compaction of naked DNA and of prokaryotic and eukaryotic genomes (47–49). The con-  
358 densation of DNA by polyethylene glycol (PEG) requires sufficient counterions to screen repul-  
359 sive electrostatic interactions in the condensed material. Precipitation of DNA by PEG is com-  
360 monly performed in the presence of at least 0.5 M NaCl; in the presence of 0.2 M NaCl, DNA  
361 resists precipitation by PEG concentrations as high as 12% (47). In contrast, chromosomes  
362 were efficiently condensed by 6.5% PEG at a molar ionic strength below 0.01 (Figure 5A).  
363 The difference in behavior between DNA and chromosomes may be attributed to the histone  
364 proteins, which partially neutralize the charge of the DNA in chromatin and thereby diminish  
365 the strong repulsive forces that would otherwise oppose close packing in the condensed state.  
366 Whereas chromosome condensation was first order in polyamine concentration (Figure 3A), it  
367 was sixth order in PEG concentration (Figure 5A), indicative of a highly cooperative process.  
368 The dielectric constant of the solution was negligibly affected over the range of PEG concen-  
369 trations tested (50), and therefore cannot explain the observed behavior. The mechanism of  
370 PEG-mediated condensation involves the excluded volume effect, reduction of water activity,  
371 and, to the extent that PEG is non-penetrating, osmotic pressure.

372 Highly cooperative chromosome condensation (up to sixth-order dependence) was also  
373 caused by proteins, apparently nonspecifically, as it was induced by all proteins of molecu-  
374 lar weights 10–100 kDa tested, including bovine serum albumin (BSA), chicken egg lysozyme,  
375 and catalytically inactive tobacco etch virus (TEV) protease (Figure 5B). The effect was mod-  
376 ulated by charge neutralization, as basic proteins were considerably more potent than acidic  
377 ones. Differences in efficacy were explained by differences in the isoelectric points of the pro-  
378 teins (Figure 5C). Nevertheless, charge neutralization alone could not explain the effect, since  
379 acidic proteins — which augment fixed charge and thereby promote swelling — also induced  
380 condensation. Furthermore, the high degree of cooperativity compared with counterion-driven



381 condensation (Figure 3A) indicated a role for factors beyond neutralization. Protein-mediated  
382 condensation was likely due to bridging between chromatin fibers. Bridging occurs through  
383 the interaction of charged elements of the fibers (for example negatively charged DNA phos-  
384 phates and positively charged histone amino terminal tails) with sites of opposite charge on the  
385 proteins.

386 The sensitivity of the chromosomal response to environmental perturbation varied over a  
387 wide range (Figure 5D), and in a manner that depended upon the particular effect of a perturba-  
388 tion on chromatin. The response was gradual for perturbations that brought about a reduction in  
389 the ion osmotic pressure (black and blue curves in Figure 5D), whereas the response was highly  
390 cooperative for perturbations that acted through macromolecular crowding or fiber bridging (red  
391 curves in Figure 5D). Because chromatin, both mitotic and interphase, was condensed in almost  
392 any medium other than nearly pure water, *condensation may be regarded as the favored or “de-  
393 fault” state of the chromosomal material in the cellular milieu, with its high concentrations of  
394 protein and multivalent cations.*

395 **Relevance to chromosome condensation-decondensation in nucleio** Swelling and deswelling  
396 of chromatin is not specific to the mitotic state (51). Nuclei exhibit similar behavior, swelling  
397 in low salt and collapsing in the presence of multivalent ions (Figure S2B). The nature of  
398 chromatin as an ionic hydrogel thus pertains in the interphase nucleus as well. In the inter-  
399 phase nucleus, chromatin is partitioned into so-called topologically associating domains, or  
400 “TADs” (52, 53), identified by an apparent enrichment of interactions within a domain com-  
401 pared to interactions with sites outside the domain. Detection of such interactions routinely  
402 involves the use of a chemical cross-linker (54). By examining the effect of chemical cross-  
403 linking on condensation behavior, we found that cross-linking preserves chromatin conforma-  
404 tion only in the condensed state. Cross-linking of decondensed chromosomes had no apparent

405 effect on their condensation-decondensation behavior (Figure 6A, top), whereas similar treat-  
406 ment of condensed chromosomes left them irreversibly condensed (Figure 6A, bottom). The  
407 average behavior for more than a hundred chromosomes (Figure 6B) was similar to that of nu-  
408 clei (Figure 6C). The dependence of TAD detection on cross-linking (54) simply reflects the  
409 introduction of cross-links in condensed regions (Figures 6A and 6C, lower panels) but not de-  
410 condensed ones (Figures 6A and 6C, upper panels), facilitated by differences in local chromatin  
411 density. TADs may be identified on this basis as condensed regions, consistent with previous  
412 studies on *Drosophila* polytene chromosomes (55, 56).

413 **Principles of mitotic chromosome structure** Mitotic chromosome structure derives from  
414 two organizing principles, a linear configuration of chromatin loops and a volume phase tran-  
415 sition of the chromatin hydrogel. Chromosomal cylindricality and uniformity of width emerge  
416 simply from the minimization of surface area along a linear axis. The condensed state is favored,  
417 and largely maintained in interphase, by the conditions of the cellular milieu. Condensation by  
418 collapse of a hydrogel resolves the central paradox of the mitotic chromosome, the organiza-  
419 tion of a heterogeneous fiber in a regular structure. Collapse is compatible with local variation  
420 within an overall condensed structure.

421 Relaxation of the forces responsible for condensation is commonly thought to explain the  
422 uncoiling of chromosomal material in the interphase state. We find, however, that the condensed  
423 state is the “default” state, pertaining in interphase except in regions where, for purposes such as  
424 gene activity, decondensation is driven by forces or mechanisms that remain to be determined.

425 **Chromatin structural disorder** Hysteresis is a non-equilibrium phenomenon; despite being  
426 apparently smooth, hysteresis loops consist of a series of microscopically discrete, irreversible  
427 transitions or “jumps” (57). The precise shape of a hysteresis loop depends upon detailed ma-  
428 terial properties — steeper loops signify fewer jumps and more regular structure, while broader

429 loops signify more jumps and less regular structure. If in the case of chromatin fibers the  
430 pattern of coiling or folding were relatively uniform, then so too would be the energy barrier  
431 to structural change, and transitions would occur over a narrow range of effector concentra-  
432 tion. If instead the coiling or folding were variable, then the energy barrier to structural change  
433 would also vary, resulting in more gradual transitions. The breadth of the observed chromosome  
434 condensation-decondensation hysteresis loops (Figure 4A) therefore points to a significant de-  
435 gree of chromatin structural disorder. Chromatin evidently adopts heterogeneous and disordered  
436 conformations in both condensed and decondensed states.

437 **Consistency with prior evidence** The idea of chromosomes as gels is consistent with previ-  
438 ous suggestions and experimental findings (7, 16, 58). The composition of chromosomes lends  
439 itself to gel formation, with an abundant polyelectrolyte, amenable to cross-linking by various  
440 agents, including multivalent cations (59), histone tails (60), and non-histone proteins (61, 62).  
441 Our work has placed the gel idea on a firm basis, going beyond conjecture and pertinent obser-  
442 vations to a definitive experimental and theoretical identification of the chromosomal material  
443 as an ionic hydrogel. The concordance of our quantitative measurements with classical physico-  
444 chemical theory, adapted for chromosomal material, led us to the discovery of the fundamental  
445 basis for chromosome condensation, collapse of the gel through a VPT.

446 Chromosome condensation-decondensation has been variously attributed to the formation  
447 and unraveling of hierarchical chromatin structure (16, 63, 64), the assembly and disassembly of  
448 multi-layered plate structures (65), and the formation and dissolution of a polymer melt (66, 67).  
449 The involvement of liquid-liquid phase separation has also recently been suggested (68, 69). A  
450 polymer melt is a neat, polymeric liquid above its glass transition or crystallization temperature,  
451 whereas a polymer gel is a “soft solid” comprising polymer and solvent (70). Unlike liquid-  
452 liquid phase separation, mixing of polymer and solvent (embodied in our model by Equation 2)

453 is just one of several processes determining the state of a gel. Elasticity — which chromo-  
454 somes are known to possess (71) and which is embodied in our model by Equation 3 — is  
455 difficult to reconcile with a polymer melt or a phase-separated liquid mixture. Melts may re-  
456 spond elastically to a deformation over short timescales, but like other liquids, they ultimately  
457 yield to viscous flow. By contrast, gels possess rigidity, allowing them to maintain their shape  
458 under deformation. Elasticity explains why chromosomes do not dissolve under solution condi-  
459 tions (Figure 3A) which bring about the dissolution of chromatin condensates (69). In addition  
460 to mixing and elastic forces, the structure of polyelectrolyte gels is determined by an ion os-  
461 motic pressure (embodied in our model by Equation 4). This pressure explains the distention of  
462 chromosomes in low salt (Figure 3C). Structures that effectively retain fixed charge, including  
463 networks and semipermeable membranes (24), give rise to stable ion pressures and can assume  
464 a particular swollen state indefinitely under fixed conditions. In contrast, structures that permit  
465 the egress of fixed charge, including polymer melts and phase-separated liquid droplets, would  
466 be incompatible with the ion pressure observed. The surface tension of a liquid droplet, for  
467 instance, hinders but does not prevent the diffusion of its contents. The condensation profiles  
468 observed could not be fit by models lacking elastic or ion osmotic terms, indicating that sim-  
469 ple binary mixing implied by liquid-liquid phase separation (70) cannot explain the observed  
470 behavior. Recent findings of liquid-liquid phase separation behavior in chromatin likely reflect  
471 the coil-globule transition of chromatin lacking persistent cross-links (top half of Figure 4F).

472       Condensation by collapse of a hydrogel is consistent with many observations, including  
473 stable organization with regional mobility, local heterogeneity of condensation state, morpho-  
474 logical memory, cessation of DNA transactions during mitosis, chromosome cylindricity (in the  
475 presence of a scaffold), and Hi-C contact frequencies. The positional stability of a gel enables  
476 local structural variation; specific regions may be decondensed by targeted disruption of cross-  
477 links, by local control of polymer properties such as charge density, and so forth. Inasmuch as

478 hysteresis implies a form of morphological memory, local changes in chromatin condensation  
479 could persist even after removal of a stimulus, such as a local change in cross-linking or poly-  
480 mer properties. Condensation is fundamentally a syneresis (removal of water); the reduction  
481 in intrachromosomal water activity, and the barrier to diffusion posed by the high density of  
482 the collapsed state may explain the cessation of DNA transactions during mitosis. Finally, as  
483 mentioned, the cylindricity of mitotic chromosomes emerges as a basic property of an axially  
484 organized gel. An unscaffolded chromatin network model was previously proposed on the basis  
485 of the loss of chromosomal elasticity upon nuclease digestion (7). Such a model is difficult to  
486 reconcile with the linearity of chromosomes. In contrast, we observe a central filament by light  
487 microscopy which colocalizes with putative scaffold components and can be isolated as a dis-  
488 crete entity by nuclease digestion of chromosomes. The existence of a scaffold is also supported  
489 by a recent Hi-C analysis of metaphase chromosomes (5).

490 Previous Hi-C analysis of mitotic chromosomes demonstrated a loss of chromosome com-  
491 partments and topologically associating domains (TADs) (72). Relatively uniform Hi-C contact  
492 frequencies have been observed for metaphase chromosomes, with a slow decline of contact  
493 frequency out to 10 Mb (72), and within TADs of the interphase nucleus (52, 53). The apparent  
494 contact of chromatin at one location in a region with chromatin at every other location may be  
495 explained by an ensemble average over many collapsed hydrogels. In interphase, the chromatin  
496 hydrogel is partitioned by region-specific decondensation into TADs, which are maintained by  
497 structural proteins such as CTCF. Upon entry to mitosis, the removal of these boundary pro-  
498 teins (73) may trigger the disappearance of TADs and chromosome-wide hydrogel collapse.  
499 Collapsed chromatin hydrogels are susceptible to cross-linking, whereas swollen ones are not  
500 (Figure 6), pointing to a relationship between TADs and the collapsed gel phase.

501 **Relevance to physiologic condensation** Our demonstration of the hydrogel nature of the  
502 chromosome relied on its propensity to swell in low-salt solutions. Nevertheless, the gener-  
503 ality of our conclusions does not depend on particular solution conditions. Indeed, a gel will  
504 remain a gel so long as its cross-links, be they static or dynamic, persist. Raising the ionic  
505 strength to physiologic levels will not alter the nature of the chromosome as a gel, though it  
506 will increase the degree of condensation. Indeed, at physiologic ionic strength ( $\log c \approx -0.8$   
507 in Figure 3I), the chromosome is largely (though not fully) condensed. Likewise, *in vivo*, most  
508 chromatin is condensed most of the time. Only limited regions are subjected to decondensation,  
509 for purposes of gene activity and so forth, as dictated by the metabolic needs of the cell. The  
510 preponderance of condensed chromatin *in vivo* is explained by our observation that condensa-  
511 tion is the natural or “default” state of chromatin in physiologic solution. How then is regio-  
512 elective decondensation of the chromosomal gel achieved? The most probable explanation is  
513 through local modification of network properties, including charge and cross-link density, me-  
514 diated by site-specific histone-modifying and chromatin-remodeling activities. As noted, most  
515 negative charge resides in the DNA phosphates, while most positive charge resides in the his-  
516 tones, especially in their amino-terminal tails. The theory of polyelectrolyte gels rationalizes  
517 how post-translational modifications affecting the charges of the tails can influence condensa-  
518 tion. All histone post-translational modifications will affect mixing thermodynamics through  
519 effects on  $\chi$  (Equation 2) that are difficult to predict quantitatively, and some, like lysine acety-  
520 lation, will also affect the charge density of the gel ( $z_2$  in Equation 5). Various processes will  
521 affect the density of intrachromosomal cross-linking ( $N_x$  in Equation 3), including histone post-  
522 translational modifications (e.g., H4K16ac (74)), changes in concentrations of polyvalent ions,  
523 and topological interactions (e.g., mediated by various SMC complexes (62)). Among these  
524 effects, variation of  $\chi$  has the most profound effect on chromosome volume at physiologic ionic  
525 strength, where it is predicted to induce a VPT (Figure S7).

526 The cellular mediators of mitotic chromosome condensation remain to be established. The  
527 level of histone acetylation is significantly reduced around the time of entry to mitosis (75, 76).  
528 Preventing this loss by inhibition of histone deacetylase activity prevents chromosome conden-  
529 sation (77). The basis for the effect appears to reside in the post-translational modification  
530 state of the histones (78). These findings are readily explained by our model (Figure S7): his-  
531 tone deacetylation effectively reduces the negative charge density of chromatin (i.e., reduces the  
532 magnitude of  $z_2$ ) and is predicted to diminish chromatin solubility through effects on  $\chi$  favoring  
533 demixing. In addition to the effects of histone post-translational modifications, the widespread  
534 condensation seen during mitosis is likely promoted by changes in the cellular milieu, such as  
535 by increases in the concentration of magnesium (79) and polyamines (80). The bound pool of  
536 polyamines undergoes a dramatic, transient rise at the time of cell division (80), which may  
537 be sufficient to induce a volume phase transition. Indeed, the degree of condensation of chro-  
538 mosomes in solutions of physiologic ionic strength (about three quarters, using the convention  
539 adopted herein) is similar to that at which condensation reactions become thermodynamically  
540 irreversible (compare Figures 3I and 4A), suggesting that chromosomes are poised to exploit  
541 the properties of the adjacent volume phase transition.

542 A transition to a more condensed phase entails attractive interactions, which form nonco-  
543 valent cross-links in a hydrogel. Our findings demonstrate the importance of charge-charge  
544 interactions in the condensation of a chromatin hydrogel. Additional interactions of the tails  
545 and other proteins may modulate condensation as well. The identification and roles of such  
546 interactions in the VPT and in the reversal of the VPT for decondensation in interphase remain  
547 to be determined. Other outstanding questions include the assembly of the central filament, or  
548 scaffold, the trajectories of chromatin fibers in the condensed state, and the relationship to gene  
549 activity.

550 **Acknowledgments** We thank Peter Geiduschek for reviewing this manuscript, Snezana Djord-  
551 jevic for the generous gift of TEV protease expression plasmids, Geoffrey Wahl and Teru Kanda  
552 for generously providing the H2B-GFP-expressing HeLa cell line, and Jon Mulholland and the  
553 Stanford Cell Sciences Imaging Facility for microscope access and training.

554 **Funding** This research was supported by NIH grants 1R01DK121366 (R.D.K) and T32GM007365  
555 (A.J.B.).

556 **Contribution** All authors contributed to study design and writing of the manuscript. A.J.B  
557 and P-J M. performed the experiments. A.J.B performed the computational analysis.

558 **Competing interest** The authors declare no conflict of interest.

559 **Data and materials availability** Raw data will be made available upon request.

## 560 **Supplementary Materials**

561 Materials and Methods

562 Supplementary Text

563 Figures S1-S7

564 Movie S1

565 References (81–97)

## 566 **References**

- 567 1. J. R. Paulson, U. Laemmli, The structure of histone-depleted metaphase chromosomes. *Cell*  
568 **12**, 817–828 (1977).



- 569 2. C. D. Lewis, U. K. Laemmli, Higher order metaphase chromosome structure: evidence for  
570 metalloprotein interactions. *Cell* **29**, 171–181 (1982).
- 571 3. W. C. Earnshaw, B. Halligan, C. A. Cooke, M. Heck, L. F. Liu, Topoisomerase II is a  
572 structural component of mitotic chromosome scaffolds. *J. Cell Biol* **100**, 1706–1715 (1985).
- 573 4. N. Saitoh, I. G. Goldberg, E. R. Wood, W. C. Earnshaw, ScII: an abundant chromosome  
574 scaffold protein is a member of a family of putative atpases with an unusual predicted  
575 tertiary structure. *J. Cell Biol* **127**, 303–318 (1994).
- 576 5. J. H. Gibcus, *et al.*, A pathway for mitotic chromosome formation. *Science* **359**, p.  
577 eaao6135 (2018).
- 578 6. T. A. Okada, D. E. Comings, A search for protein cores in chromosomes: is the scaffold an  
579 artifact? *Am. J. Hum. Genet* **32**, p. 814 (1980).
- 580 7. M. G. Poirier, J. F. Marko, Mitotic chromosomes are chromatin networks without a me-  
581 chanically contiguous protein scaffold. *Proc. Natl. Acad. Sci.* **99**, 15393–15397 (2002).
- 582 8. P. B. Moens, R. E. Pearlman, H. H. Heng, *Curr. Top. Dev. Biol.* (Elsevier, 1997), vol. 37,  
583 241–262.
- 584 9. J. Rückert, *Zur Entwicklungsgeschichte des Ovarialeies bei Selachiern* (1892).
- 585 10. E. Alipour, J. F. Marko, Self-organization of domain structures by DNA-loop-extruding  
586 enzymes. *Nucleic acids research* **40**, 11202–11212 (2012).
- 587 11. A. Goloborodko, J. F. Marko, L. A. Mirny, Chromosome compaction by active loop extru-  
588 sion. *Biophys. J.* **110**, 2162–2168 (2016).

- 589 12. M. Bennett, J. Heslop-Harrison, J. Smith, J. Ward, DNA density in mitotic and meiotic  
590 metaphase chromosomes of plants and animals. *J. Cell Sci.* **63**, 173–179 (1983).
- 591 13. K. Samejima, *et al.*, Functional analysis after rapid degradation of condensins and 3D-EM  
592 reveals chromatin volume is uncoupled from chromosome architecture in mitosis. *J. Cell*  
593 *Sci* **131**, p. jcs210187 (2018).
- 594 14. C. E. Somers, A. Cole, T. Hsu, Isolation of chromosomes. *Exp. Cell Res.* **9**, 220–234 (1963).
- 595 15. A. J. Maniotis, K. Bojanowski, D. E. Ingber, Mechanical continuity and reversible chromo-  
596 some disassembly within intact genomes removed from living cells. *J. Cell. Biochem.* **65**,  
597 114–130 (1997).
- 598 16. M. G. Poirier, T. Monhait, J. F. Marko, Reversible hypercondensation and decondensation  
599 of mitotic chromosomes studied using combined chemical–micromechanical techniques. *J.*  
600 *Cell. Biochem.* **85**, 422–434 (2002).
- 601 17. F. Thoma, T. Koller, A. Klug, Involvement of histone H1 in the organization of the nucle-  
602 osome and of the salt-dependent superstructures of chromatin. *J. Cell Biol.* **83**, 403–427  
603 (1979).
- 604 18. V. A. Bloomfield, DNA condensation by multivalent cations. *Biopolymers: Original Re-*  
605 *search on Biomolecules* **44**, 269–282 (1997).
- 606 19. E. Raspaud, M. O. De La Cruz, J.-L. Sikorav, F. Livolant, Precipitation of DNA by  
607 polyamines: a polyelectrolyte behavior. *Biophys. J.* **74**, 381–393 (1998).
- 608 20. E. Raspaud, I. Chaperon, A. Leforestier, F. Livolant, Spermine-induced aggregation of  
609 DNA, nucleosome, and chromatin. *Biophys. J.* **77**, 1547–1555 (1999).

- 610 21. L. C. Gosule, J. A. Schellman, Compact form of DNA induced by spermidine. *Nature* **259**,  
611 333–335 (1976).
- 612 22. D. Sen, D. M. Crothers, Condensation of chromatin: role of multivalent cations. *Biochem-*  
613 *istry* **25**, 1495–1503 (1986).
- 614 23. N. Korolev, A. P. Lyubartsev, L. Nordenskiöld, A systematic analysis of nucleosome core  
615 particle and nucleosome-nucleosome stacking structure. *Sci. Rep.* **8**, p. 1543 (2018).
- 616 24. P. J. Flory, *Principles of polymer chemistry* (Cornell University Press, 1953).
- 617 25. J. Rička, T. Tanaka, Swelling of ionic gels: quantitative performance of the donnan theory.  
618 *Macromolecules.* **17**, 2916–2921 (1984).
- 619 26. L. Brannon-Peppas, N. A. Peppas, Equilibrium swelling behavior of pH-sensitive hydro-  
620 gels. *Chemical Engineering Science* **46**, 715–722 (1991).
- 621 27. V. A. Bloomfield, Condensation of DNA by multivalent cations: considerations on mecha-  
622 nism. *Biopolymers: Original Research on Biomolecules* **31**, 1471–1481 (1991).
- 623 28. T. Amiya, Y. Hirokawa, Y. Hirose, Y. Li, T. Tanaka, Reentrant phase transition of N-  
624 isopropylacrylamide gels in mixed solvents. *J. Chem. Phys* **86**, 2375–2379 (1987).
- 625 29. J. Heyda, J. Dzubiella, Ion-specific counterion condensation on charged peptides: Poisson-  
626 Boltzmann vs. atomistic simulations. *Soft Matter* **8**, 9338–9344 (2012).
- 627 30. C. G. Baumann, S. B. Smith, V. A. Bloomfield, C. Bustamante, Ionic effects on the elastic-  
628 ity of single DNA molecules. *Proc. Natl. Acad. Sci.* **94**, 6185–6190 (1997).
- 629 31. K. Besteman, K. Van Eijk, S. Lemay, Charge inversion accompanies DNA condensation by  
630 multivalent ions. *Nat. Phys* **3**, p. 641 (2007).

- 631 32. X. Qiu, *et al.*, Inter-DNA attraction mediated by divalent counterions. *Phys. Rev. Lett.* **99**,  
632 p. 038104 (2007).
- 633 33. J.-L. Barrat, J.-F. Joanny, P. Pincus, On the scattering properties of polyelectrolyte gels. *J.*  
634 *Phys. II* **2**, 1531–1544 (1992).
- 635 34. P. E. Warburton, *et al.*, Immunolocalization of CENP-A suggests a distinct nucleosome  
636 structure at the inner kinetochore plate of active centromeres. *Curr. Biol.* **7**, 901–904 (1997).
- 637 35. K. E. Gascoigne, I. M. Cheeseman, Kinetochore assembly: if you build it, they will come.  
638 *Curr. Opin. Cell Biol* **23**, 102–108 (2011).
- 639 36. X.-W. Guo, R. D. Cole, Chromatin aggregation changes substantially as pH varies within  
640 the physiological range. *J. Biol. Chem.* **264**, 11653–11657 (1989).
- 641 37. R. M. Izatt, J. J. Christensen, J. H. Rytting, Sites and thermodynamic quantities associated  
642 with proton and metal ion interaction with ribonucleic acid, deoxyribonucleic acid, and  
643 their constituent bases, nucleosides, and and nucleotides. *Chemical Reviews* **71**, 439–481  
644 (1971).
- 645 38. K. Dušek, D. Patterson, Transition in swollen polymer networks induced by intramolecular  
646 condensation. *J. Polym. Sci. A1* **6**, 1209–1216 (1968).
- 647 39. T. Tanaka, Collapse of gels and the critical endpoint. *Phys. Rev. Lett.* **40**, p. 820 (1978).
- 648 40. M. Brokate, J. Sprekels, *Hysteresis and phase transitions*, vol. 121 (Springer Science &  
649 Business Media, 2012).
- 650 41. R. Gilmore, Catastrophe time scales and conventions. *Phys. Rev. A* **20**, p. 2510 (1979).
- 651 42. G. Bertotti, I. D. Mayergoyz, *The Science of Hysteresis: 3-volume set* (Elsevier, 2005).

- 652 43. D. Knittel, S. Pack, S. Lin, L. Eyring, A thermodynamic model of hysteresis in phase  
653 transitions and its application to rare earth oxide systems. *J. Chem. Phys.* **67**, 134–142  
654 (1977).
- 655 44. T. Tanaka, Phase transitions in gels and a single polymer. *Polymer* **20**, 1404–1412 (1979).
- 656 45. L. C. Gosule, J. A. Schellman, DNA condensation with polyamines: I. Spectroscopic stud-  
657 ies. *J. Mol. Biol.* **121**, 311–326 (1978).
- 658 46. J. Widom, R. L. Baldwin, Monomolecular condensation of  $\lambda$ -DNA induced by cobalt hex-  
659 ammine. *Biopolymers* **22**, 1595–1620 (1983).
- 660 47. J. T. Lis, R. Schleif, Size fractionation of double-stranded DNA by precipitation with  
661 polyethylene glycol. *Nucleic Acids Res.* **2**, 383–390 (1975).
- 662 48. S. Cunha, C. L. Woldringh, T. Odijk, Polymer-mediated compaction and internal dynamics  
663 of isolated escherichia coli nucleoids. *J. Struct. Biol* **136**, 53–66 (2001).
- 664 49. R. Hancock, Structure of metaphase chromosomes: a role for effects of macromolecular  
665 crowding. *PLoS One* **7**, p. e36045 (2012).
- 666 50. K. Arnold, A. Herrmann, L. Pratsch, K. Gawrisch, The dielectric properties of aqueous  
667 solutions of poly-(ethylene glycol) and their influence on membrane structure. *Biochim.*  
668 *Biophys. Acta Biomembr.* **815**, 515–518 (1985).
- 669 51. L. Churney, The osmotic properties of the nucleus. *Biol. Bull.* **82**, 52–67 (1942).
- 670 52. J. R. Dixon, *et al.*, Topological domains in mammalian genomes identified by analysis of  
671 chromatin interactions. *Nature* **485**, p. 376 (2012).

- 672 53. E. P. Nora, *et al.*, Spatial partitioning of the regulatory landscape of the X-inactivation  
673 centre. *Nature* **485**, 381–385 (2012).
- 674 54. H. Belaghzal, J. Dekker, J. H. Gibcus, Hi-C 2.0: An optimized Hi-C procedure for  
675 high-resolution genome-wide mapping of chromosome conformation. *Methods* **123**, 56–  
676 65 (2017).
- 677 55. K. P. Eagen, T. A. Hartl, R. D. Kornberg, Stable chromosome condensation revealed by  
678 chromosome conformation capture. *Cell* **163**, 934–946 (2015).
- 679 56. S. V. Uljanov, *et al.*, Active chromatin and transcription play a key role in chromosome  
680 partitioning into topologically associating domains. *Genome Res* **26**, 70–84 (2016).
- 681 57. J. Sethna, *Statistical mechanics: entropy, order parameters, and complexity*, vol. 14 (Ox-  
682 ford University Press, 2006).
- 683 58. R. Chambers, Some physical properties of the cell nucleus. *Science* **40**, 824–827 (1914).
- 684 59. J. A. Schellman, N. Parthasarathy, X-ray diffraction studies on cation-collapsed DNA. *J.*  
685 *Mol. Biol* **175**, 313–329 (1984).
- 686 60. A. Bertin, A. Leforestier, D. Durand, F. Livolant, Role of histone tails in the conformation  
687 and interactions of nucleosome core particles. *Biochemistry* **43**, 4773–4780 (2004).
- 688 61. R. Schleif, DNA looping. *Annu. Rev. Biochem* **61**, 199–223 (1992).
- 689 62. C. H. Haering, J. Löwe, A. Hochwagen, K. Nasmyth, Molecular architecture of SMC pro-  
690 teins and the yeast cohesin complex. *Mol. Cell* **9**, 773–788 (2002).
- 691 63. D. F. Hudson, P. Vagnarelli, R. Gassmann, W. C. Earnshaw, Condensin is required for  
692 nonhistone protein assembly and structural integrity of vertebrate mitotic chromosomes.  
693 *Dev. Cell* **5**, 323–336 (2003).

- 694 64. N. Kireeva, M. Lakonishok, I. Kireev, T. Hirano, A. S. Belmont, Visualization of early chro-  
695 mosome condensation: a hierarchical folding, axial glue model of chromosome structure.  
696 *J. Cell Biol* **166**, 775–785 (2004).
- 697 65. I. Gállego, P. Castro-Hartmann, J. M. Caravaca, S. Caño, J.-R. Daban, Dense chromatin  
698 plates in metaphase chromosomes. *Eur. Biophys. J* **38**, p. 503 (2009).
- 699 66. M. Eltsov, K. M. MacLellan, K. Maeshima, A. S. Frangakis, J. Dubochet, Analysis of  
700 cryo-electron microscopy images does not support the existence of 30-nm chromatin fibers  
701 in mitotic chromosomes in situ. *Proc. Natl. Acad. Sci.* **105**, 19732–19737 (2008).
- 702 67. Y. Nishino, *et al.*, Human mitotic chromosomes consist predominantly of irregularly folded  
703 nucleosome fibres without a 30-nm chromatin structure. *EMBO J.* **31**, 1644–1653 (2012).
- 704 68. A. G. Larson, *et al.*, Liquid droplet formation by HP1 $\alpha$  suggests a role for phase separation  
705 in heterochromatin. *Nature* **547**, 236–240 (2017).
- 706 69. B. A. Gibson, *et al.*, Organization of chromatin by intrinsic and regulated phase separation.  
707 *Cell* **179**, 470–484 (2019).
- 708 70. M. Rubinstein, R. H. Colby, *et al.*, *Polymer physics*, vol. 23 (Oxford University Press,  
709 2003).
- 710 71. B. Houchmandzadeh, J. F. Marko, D. Chatenay, A. Libchaber, Elasticity and structure of  
711 eukaryote chromosomes studied by micromanipulation and micropipette aspiration. *J. Cell*  
712 *Biol.* **139**, 1–12 (1997).
- 713 72. N. Naumova, *et al.*, Organization of the mitotic chromosome. *Science* **342**, 948–953 (2013).

- 714 73. T. Sekiya, K. Murano, K. Kato, A. Kawaguchi, K. Nagata, Mitotic phosphorylation of  
715 CCCTC-binding factor (CTCF) reduces its DNA binding activity. *FEBS Open Bio.* **7**, 397–  
716 404 (2017).
- 717 74. M. Shogren-Knaak, *et al.*, Histone H4-K16 acetylation controls chromatin structure and  
718 protein interactions. *Science* **311**, 844–847 (2006).
- 719 75. M. J. Kruhlak, *et al.*, Regulation of global acetylation in mitosis through loss of his-  
720 tone acetyltransferases and deacetylases from chromatin. *J. Biol. Chem* **276**, 38307–38319  
721 (2001).
- 722 76. D. Bonenfant, *et al.*, Analysis of dynamic changes in post-translational modifications of  
723 human histones during cell cycle by mass spectrometry. *Mol. & Cell. Proteomics* **6**, 1917–  
724 1932 (2007).
- 725 77. D. Cimini, M. Mattiuzzo, L. Torosantucci, F. Degrossi, Histone hyperacetylation in mitosis  
726 prevents sister chromatid separation and produces chromosome segregation defects. *Mol.*  
727 *Biol. Cell* **14**, 3821–3833 (2003).
- 728 78. A. Zhiteneva, *et al.*, Mitotic post-translational modifications of histones promote chromatin  
729 compaction in vitro. *Open Biol* **7**, p. 170076 (2017).
- 730 79. K. Maeshima, *et al.*, A transient rise in free Mg<sup>2+</sup> ions released from ATP-Mg hydrolysis  
731 contributes to mitotic chromosome condensation. *Curr. Biol.* **28**, 444–451 (2018).
- 732 80. K. Kotzabasis, H. Senger, Free, conjugated and bound polyamines during the cell cycle  
733 in synchronized cultures of *scenedesmus obliquus*. *Zeitschrift für Naturforschung C* **49**,  
734 181–185 (1994).



- 735 81. T. Kanda, K. F. Sullivan, G. M. Wahl, Histone–GFP fusion protein enables sensitive analy-  
736 sis of chromosome dynamics in living mammalian cells. *Curr. Biol.* **8**, 377–385 (1998).
- 737 82. R. Norrish, An equation for the activity coefficients and equilibrium relative humidities of  
738 water in confectionery syrups. *Int. J. Food Sci. Technol.* **1**, 25–39 (1966).
- 739 83. L. Ninni, M. Camargo, A. Meirelles, Water activity in poly-(ethylene glycol) aqueous so-  
740 lutions. *Thermochim. Acta* **328**, 169–176 (1999).
- 741 84. M. Mohsen-Nia, H. Modarress, H. Rasa, Measurement and modeling of density, kinematic  
742 viscosity, and refractive index for poly-(ethylene glycol) aqueous solution at different tem-  
743 peratures. *J. Chem. Eng. Data* **50**, 1662–1666 (2005).
- 744 85. J. M. Tenenbaum, Accommodation in computer vision., *Tech. rep.*, Stanford University  
745 Department of Computer Science (1970).
- 746 86. S. Pertuz, D. Puig, M. A. Garcia, Analysis of focus measure operators for shape-from-  
747 focus. *Pattern Recognit.* **46**, 1415–1432 (2013).
- 748 87. K. Zuiderveld, Contrast limited adaptive histogram equalization. *Graphics Gems* 474–485  
749 (1994).
- 750 88. J. Canny, A computational approach to edge detection. *IEEE Trans. Pattern Anal. Mach.*  
751 *Intell.* 679–698 (1986).
- 752 89. T. F. Chan, L. A. Vese, Active contours without edges. *IEEE Trans. Image Process.* **10**,  
753 266–277 (2001).
- 754 90. D. Aikens, *et al.*, The interactions between nucleic acids and polyamines: II. Protona-  
755 tion constants and <sup>13</sup>C-NMR chemical shift assignments of spermidine, spermine, and  
756 homologs. *Biophys. Chem.* **17**, 67–74 (1983).

- 757 91. I. S. Blagbrough, A. A. Metwally, A. J. Geall, *Polyamines* (Springer, 2011), 493–503.
- 758 92. L. R. G. Treloar, *The physics of rubber elasticity* (Oxford University Press, 1975).
- 759 93. J. Hasa, M. Ilavský, K. Dušek, Deformational, swelling, and potentiometric behavior of  
760 ionized poly (methacrylic acid) gels. I. Theory. *Journal of Polymer Science: Polymer  
761 Physics Edition* **13**, 253–262 (1975).
- 762 94. H. R. Procter, J. A. Wilson, The acid–gelatin equilibrium. *J. Chem. Soc. Trans.* **109**, 307–  
763 319 (1916).
- 764 95. S. M. Neale, The swelling of cellulose, and its affinity relations with aqueous solutions. Part  
765 I: Experiments on the behaviour of cotton cellulose and regenerated cellulose in sodium  
766 hydroxide solution, and their theoretical interpretation. *J. Textile Inst. Trans.* **20**, T373–  
767 T400 (1929).
- 768 96. D. Vermaas, J. Hermans, The swelling of cellulose xanthate gels in dilute salt solutions.  
769 *Rec. Trav. Chim. Pays Bas.* **67**, 983–997 (1948).
- 770 97. O. Grineva, V. Zhuravlev, N. Lifanova, Densities and dielectric permittivities of four poly-  
771 hydric alcohols. *J. Chem. Eng. Data* **41**, 155–157 (1996).

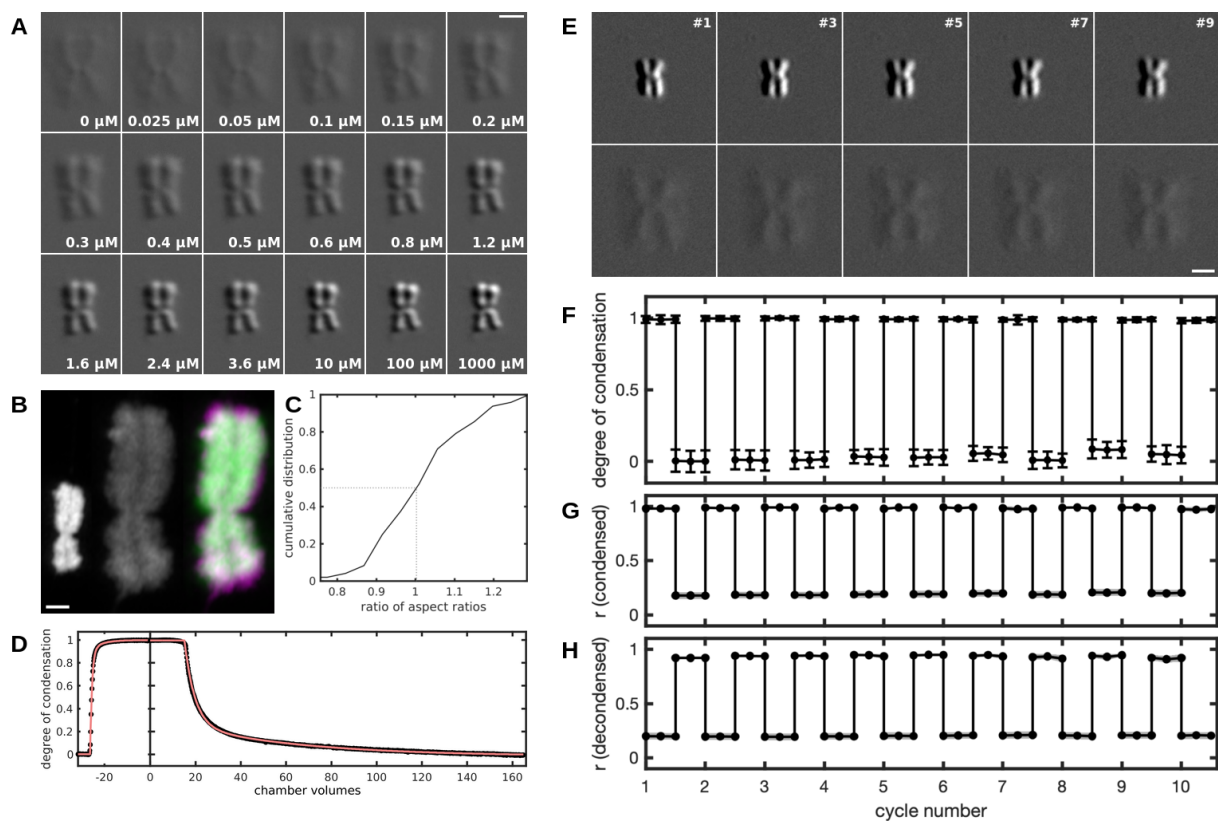

(Caption on following page.)

Figure 1: **Controlled chromosome decondensation and recondensation *in vitro*.** (A) DIC images of a chromosome demonstrating precise tuning of the degree of condensation by varying the composition of the perfusate. Solutions consisted of 5 mM Tris-HCl (pH 7.5), 2 mM KCl, and varying concentrations of spermine (indicated on the panels). Scale bar, 2  $\mu\text{m}$ . (B) Maximum intensity projections of a chromosome stained with Sytox Green (10 nM) in the presence (left) or absence (middle) of 375  $\mu\text{M}$  spermidine, showing variation in chromosome volume over one order of magnitude. The intensity of the middle chromosome was enhanced two-fold to aid visibility. The decondensed chromosome is shown again in the right panel (magenta) in superposition with the condensed chromosome (green) after the latter was isotropically expanded *in silico*. Scale bar, 1  $\mu\text{m}$ . (C) Cumulative distribution of the ratio of aspect ratios measured in three spatial dimensions for condensed and decondensed states of  $n = 16$  chromosomes. The midpoint of the distribution occurs at a ratio of unity, indicative of isotropic expansion. (D) A kinetic study of the condensation and decondensation of  $n = 161$  chromosomes prepared in a decondensed state and then exposed to 375  $\mu\text{M}$  spermidine at a rate of one chamber volume per minute (left). Decondensation was subsequently effected by flowing a spermidine-free solution [5 mM Tris-HCl (pH 7.5), 2 mM KCl] at the same rate (right). Dots represent data points and the line a biexponential model. (E) DIC images of a chromosome that was alternately condensed and decondensed by sequential provision and removal of 375  $\mu\text{M}$  spermidine. Each column of the montage corresponds to an odd-numbered cycle (first, third, fifth, seventh and ninth), and the rows correspond to 375  $\mu\text{M}$  (top) and 0  $\mu\text{M}$  (bottom) spermidine. Scale bar, 2  $\mu\text{m}$ . (F) Average condensation profile over several condensation-decondensation cycles for  $n = 140$  chromosomes; error bars denote  $\pm 1\sigma$ . (G) Pearson correlation coefficient between each image of a chromosome obtained during repeated condensation-decondensation cycling (convolved with a  $1\sigma$  Gaussian kernel) and the average of all images of the condensed states of that chromosome obtained during cycling (averaged over  $n = 140$  chromosomes; shading represents the 95% confidence interval of the estimate of the mean). (H) Same as panel G but for correlation with the average image of the decondensed state.

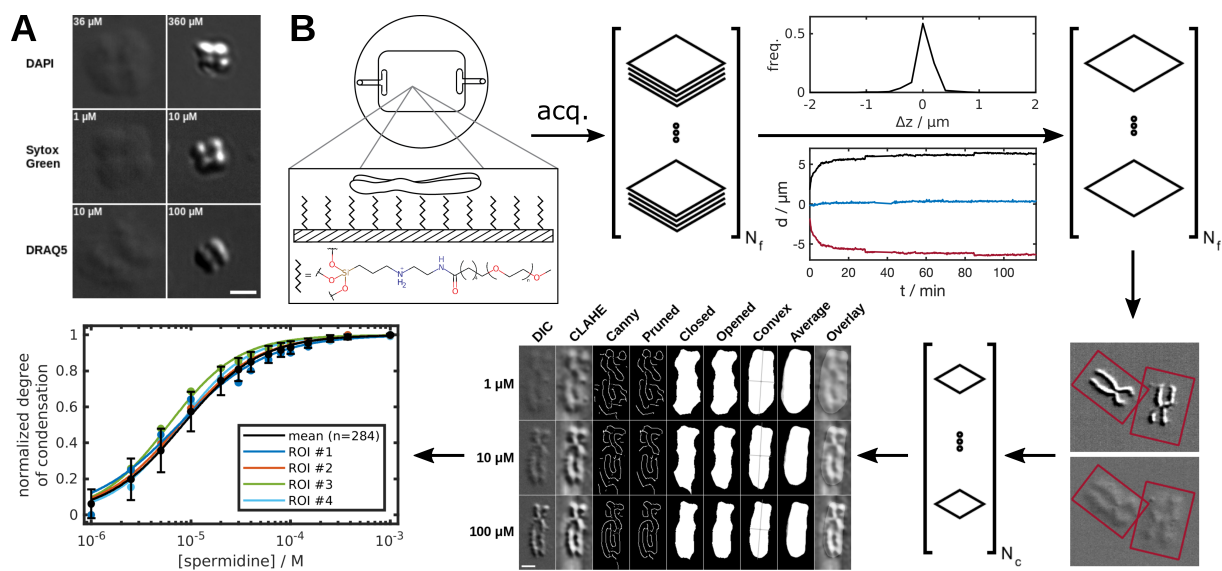

(Caption on following page.)

**Figure 2: Development of high-throughput methods for minimally perturbative characterization of chromosome morphology.** (A) Fluorescent dyes perturb morphology by inducing chromosome condensation. Chromosomes were immersed in the indicated concentrations of dye, mounted on coverslips, and imaged under DIC optics; scale bar, 2  $\mu\text{m}$ . (B) Overview of the experimental approach developed herein. An optically interfaceable, parallel-plate flow cell (top left), supporting immobilized chromosomes, was employed. A chromosome is shown adsorbed to a layer of methoxy-PEG-3-(2-aminoethylamino)propyltriethoxysilane (mPEG-AEPTES). Multiple fields ( $N_f$ ) of chromosomes are imaged in three dimensions (denoted by stack of planes) in multiple states of condensation (denoted by ellipsis). The images are subjected to automatic, three-dimensional drift correction. The  $\Delta z$  histogram shows good agreement between manually and automatically determined focal planes. Shown below is an example of drift in  $x$  (blue) and  $y$  (red), as well as overall in-plane motion (black). Applying these corrections affords a series of aligned and focused slices (depicted in the top right). Single chromosomes are selected (red boxes), giving  $N_c$  chromosomal regions of interest (ROIs) (for a typical experiment,  $N_c$  is 100–1000). Each ROI is subjected to morphological analysis (bottom middle: rows represent a single chromosome in three states of condensation, obtained by bathing in the indicated concentrations of spermidine; columns correspond to sequential processing steps), yielding condensation profiles (bottom left) representing the average behavior of many individual chromosomes. Morphological image processing steps comprise the following: (DIC) Micrographs (scale bar, 2  $\mu\text{m}$ ) subjected to linear contrast adjustment with limits determined by the minimum and maximum pixel intensities of the series of images for a given chromosome. (CLAHE) DIC images convolved with a Gaussian kernel and enhanced by contrast-limited adaptive histogram equalization. (Canny) Edge map resulting from the Canny algorithm. (Pruned) Refined edge map obtained by removal of short edges with an efficiency related to their proximity to the image perimeter. (Closed) Closure of the pruned edge map with a large, disk-shaped structuring element. (Opened) Opening of the closed image with a smaller structuring element than the one used for closing, which helps to prune spurs that would otherwise inflate the convex hull. (Convex) The convex hull of the opened image, energy-minimized against the underlying DIC image by the Chan-Vese active contour algorithm with a modest contraction bias. Superposed on the image in gray are the predicted major and minor axes of the chromosome, joined at its centroid. (Average) The preceding steps were repeated for many combinations of parameters and averaged to obtain a representative map. The grayscale value of pixels in the final map indicates the probability that a pixel overlaps a chromosome. (Overlay) Superposition of the probability-weighted mask and the histogram-equalized DIC image. Condensation profiles (bottom left) show the relationship between the degree of condensation (normalized by the degree of condensation in a pair of calibration solutions) and some independent variable (spermidine concentration in this example). Profiles are shown for individual chromosomes (ROIs 1–4) and as an average of many chromosomes (black curve).

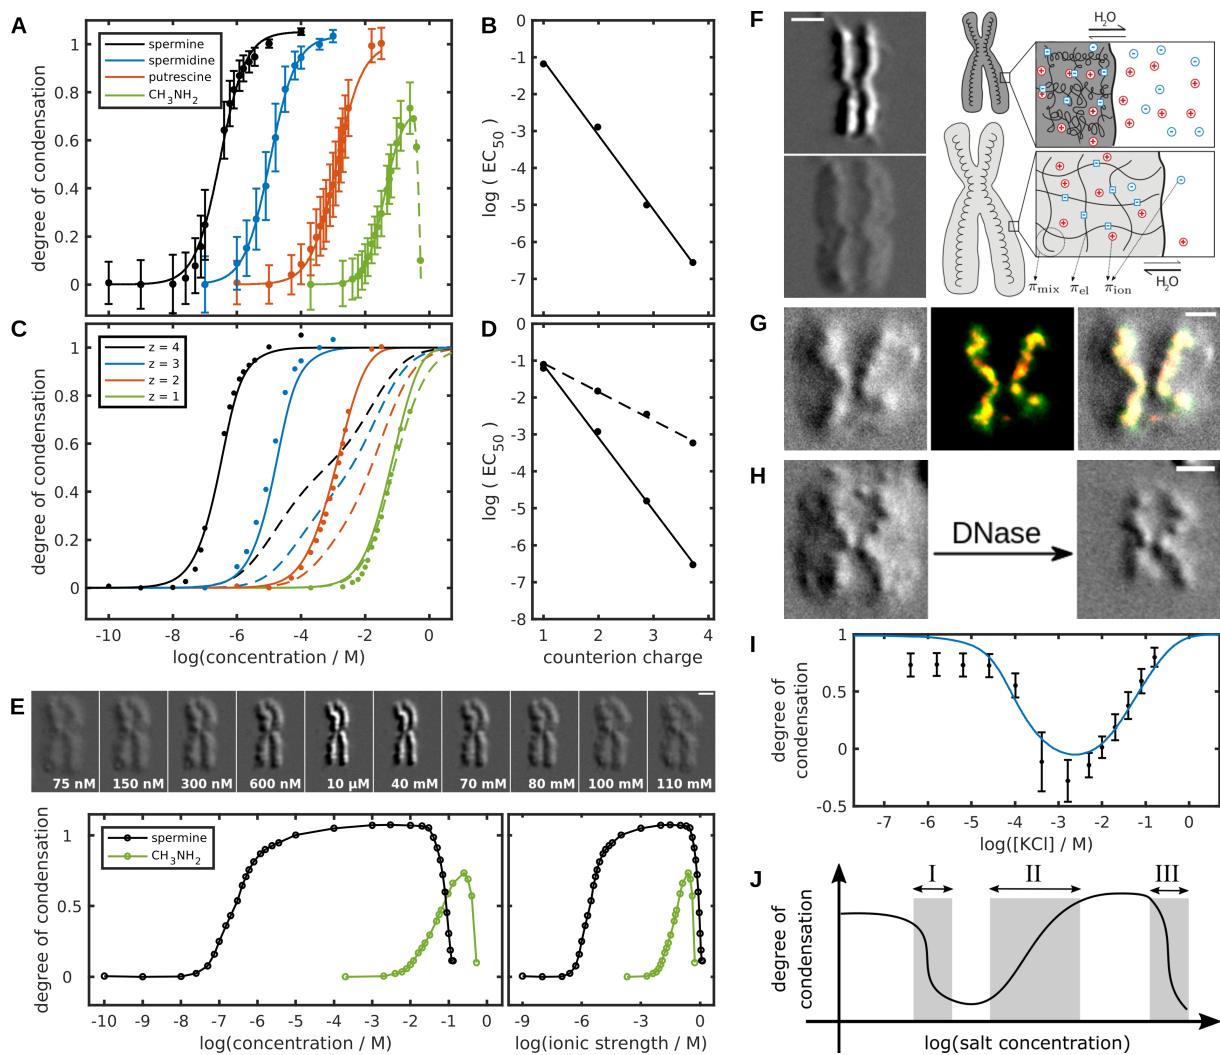

(Caption on following page.)

**Figure 3: Chromosomes are axially scaffolded ionic hydrogels.** (A) Condensation profiles for  $n = 504$  (spermine; black),  $n = 367$  (spermidine; blue),  $n = 270$  (putrescine; orange), and  $n = 208$  (methylamine; green) chromosomes are shown with error bars denoting  $\pm 1\sigma$ ; lines represent least-squares fits to the Hill model. (B) The concentrations at which condensation is 50% complete ( $EC_{50}$ ) from panel A are plotted with respect to the charge of each ion at pH 7.5, and fit by a straight line ( $r^2 = 0.996$ ). (C) Theoretical swelling curves for a polyelectrolyte gel without (dashed lines) or with (solid lines) a gel-counterion binding interaction (cf. Supplementary Information). Points represent experimental data from panel A. (D) The  $EC_{50}$  of the curves shown in panel C. The solid and dashed lines correspond, respectively, to the sets of solid and dashed curves in panel C. (E) *Top*: Variation of spermine concentration demonstrates reentrancy of chromosome condensation. DIC micrographs are shown for select concentrations; scale bar, 2  $\mu\text{m}$ . *Bottom*: Degree of chromosome condensation for  $n = 205$  chromosomes (black), in superposition with that for methylamine (green; copied from panel A), is plotted with respect to the decimal logarithm of concentration (left) or ionic strength (right; calculated in molar units according to  $I = 1/2 \sum_i c_i z_i^2$ ). (F) *Left*: DIC images of a chromosome in 375  $\mu\text{M}$  (top) and 0  $\mu\text{M}$  (bottom) spermidine. A central filament is observed upon decondensation. Scale bar, 2  $\mu\text{m}$ . *Right*: Chromosome volume is determined by three pressures, those of mixing ( $\pi_{\text{mix}}$ ), network elasticity ( $\pi_{\text{el}}$ ), and ion partitioning ( $\pi_{\text{ion}}$ ), as illustrated for a chromosome in two states of condensation; at equilibrium these pressures balance. Mixing comprises entropic and enthalpic contributions. Elasticity, empirically supported by chromosome-stretching experiments (71), describes the principally entropic resistance to deformation. The entropy of counterion confinement quantifies the electrostatic effects of the polyelectrolyte. Complete equations along with a description of the various quantities can be found in the supplementary material. (G) DIC (left) and fluorescence (middle) images of a decondensed chromosome treated with antibodies recognizing a condensin I subunit, CAP-G (green), and topoisomerase II $\alpha$  (red). Areas of overlap are shaded yellow. The merged image (right) demonstrates colocalization of the putative scaffold components with the central filament. (H) DIC images of a chromosome in a decondensed state before (left) and after (right) treatment with DNase I. (I) Chromosomes were titrated with KCl solutions prepared in argon-saturated water. Data (black; represented as mean  $\pm \sigma$ ) show the degree of chromosome condensation (normalized to [0,1] with respect to calibration solutions). The curve (blue) represents the theoretical predictions from a model parameterized as in panel C, except for the change of background solution from 5 mM Tris, 2 mM KCl to water. (J) The effect of counterions on chromosomes can be divided into three regimes dominated by: (I) proton-counterion exchange; (II) charge neutralization; (III) charge screening.



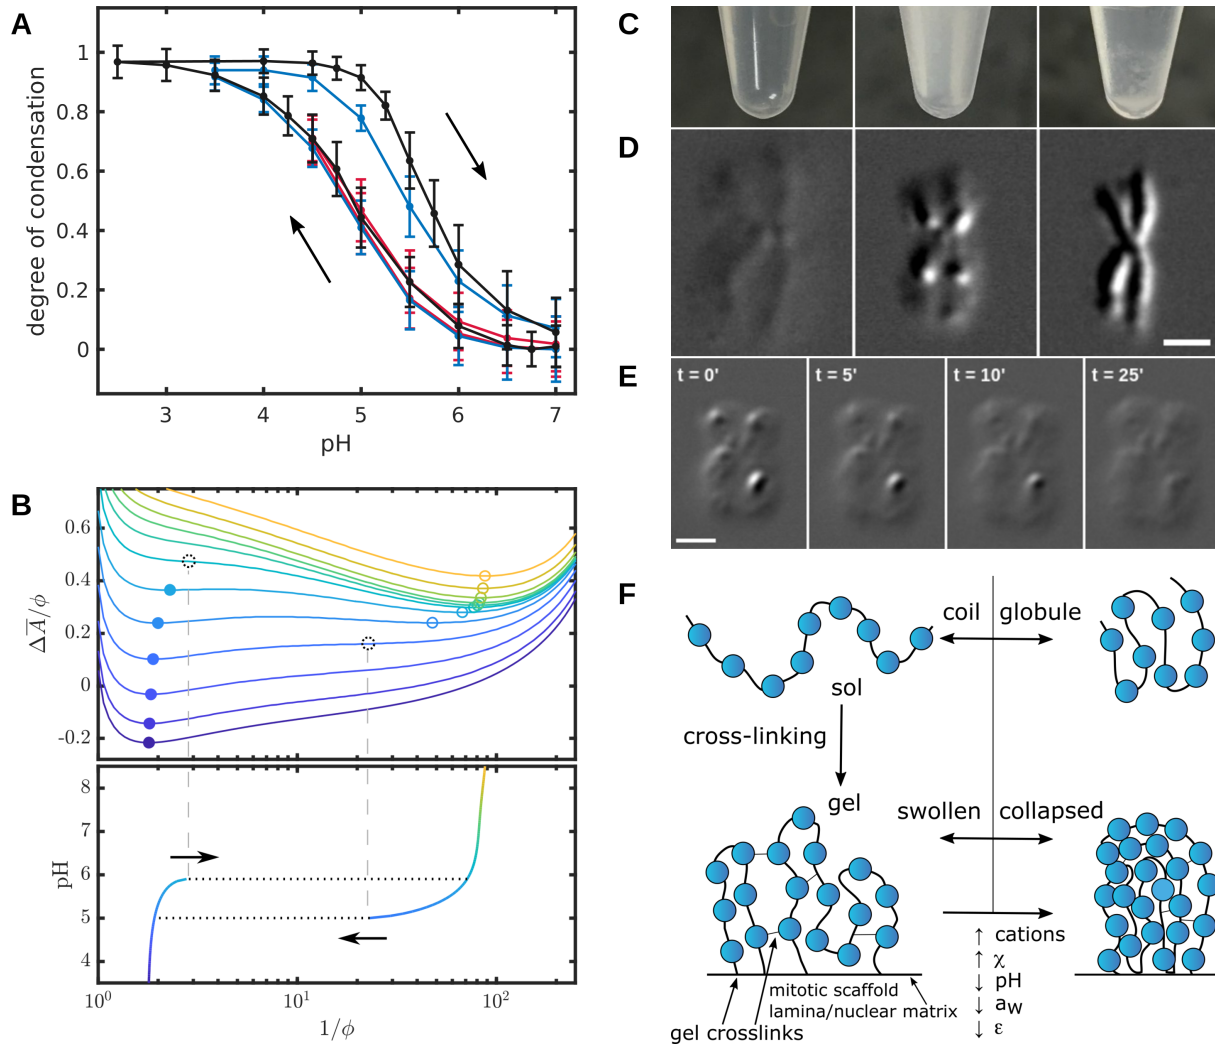

**Figure 4: Chromosome condensation involves a volume phase transition of the chromatin gel.** (A) Hysteresis caused by variation of pH. Chromosomes were condensed by acidification and subsequently decondensed by alkalization of the solution (path indicated by arrows). Hysteresis was not observed for low limiting degrees of condensation (red;  $n = 580$ ), but emerged as the limiting condensation was increased (blue [ $n = 452$ ] and black [ $n = 147$ ]). Error bars denote  $\pm 1\sigma$ . (B) Relationship between phase transitions, hysteresis, and bistability. *Top*: The Helmholtz free energy ( $\Delta\bar{A}$ ) divided by the polymer volume fraction ( $\phi$ ) is plotted with respect to the reciprocal of the polymer volume fraction. (Higher values of  $\phi$  correspond to more condensed states.) Free energy landscapes are shown for various solution pH, indicated by color (purple: pH 3.5; orange: pH 9.5). The sharp rise of free energy at the left and right sides of the graph is attributable to the entropies of demixing and chain extension, respectively. Local minima are indicated for condensed states (closed circles) and decondensed states (open circles). A single minimum is found at more extreme pH, whereas two are found at intermediate pH. Dotted black circles represent extrapolations of the trajectory of the local minima into unstable territory; such states would immediately relax to the opposite state (i.e., from condensed to decondensed or vice versa).

(continued)

Figure 4: (*Continued.*) Metastability is due to the persistent occupation of a local minimum under conditions where it is no longer the global minimum (e.g., the circles preceding the dotted ones). As the local maximum becomes less prominent, the probability that thermal fluctuations lead to escape increases, and the gel may undergo a phase transition to the state corresponding to the global minimum. The pH at which such a transition occurs differs for the forward and reverse reactions because of the asymmetry of the underlying free energy functions. *Bottom:* The solution pH (colored as in the top panel) is plotted with respect to the positions of free energy minima, demonstrating a hysteresis loop. Loop directionality is indicated by arrows. Breaks in the curve (denoted by dotted lines) occur at stationary points (where the first and second derivatives of the free energy are simultaneously zero). Beyond the *closure points* of the loop, there is a single minimum in the free energy (i.e., a horizontal line intercepts the graph only once). As in panel A, a phase transition does not occur for small perturbations, but once one has occurred, return along the same path becomes impossible. (C) Chromosomes condensation was apparent macroscopically by flocculation of suspended chromosomes. A suspension of 0.8  $A_{260}$  units of chromosomes (left) exposed to 375  $\mu\text{M}$  spermidine opacified after one minute at room temperature (middle) and subsequently sedimented under the influence of gravity (right). (D) A chromosome is shown in decondensed (left), condensed (right), and phase-separated (middle) states. (E) Beginning from a phase-separated state (left), chromosomes were washed with 5 mM Tris-HCl (pH 7.5), 2 mM KCl, causing movement of the phase boundary between condensed and decondensed phases until the latter phase was completely eliminated (right). Scale bar for panels D and E: 2  $\mu\text{m}$ . (F) Relation between the condensation of chromatin and chromosomes. Chromatin fibers, present as a dilute solution in water, adopt a coil configuration and behave as a sol (top left); addition of multivalent ions results in polymer collapse through a coil-globule transition (top right) which may be realized intramolecularly or intermolecularly depending on the concentration. These condensates may have the properties of a physical hydrogel (e.g., due to bridging by multivalent counterions), but they will revert to a sol in the limit of infinite dilution. In contrast, cross-linking the polymer (bottom left) through inter-fiber contacts (which may be mediated by cations or proteins) and fiber-matrix contacts (where “matrix” encompasses the scaffold in mitosis and nuclear lamina/matrix in interphase) introduces elastic restoring forces, which prevent dissolution at infinite dilution. Under certain conditions, the gel will collapse to a condensed state (bottom right). This VPT of the chromosomal gel (bottom) is a manifestation of the coil-globule transition of the chromatin sol (top). This transition is responsive to environmental parameters, as indicated.

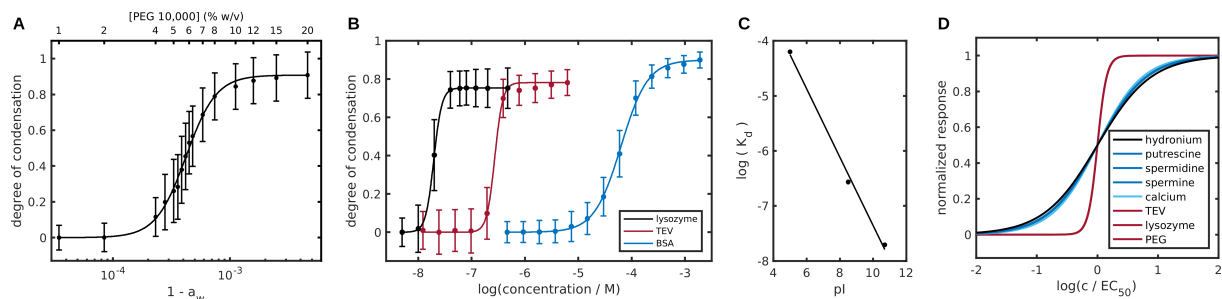

**Figure 5: Molecular crowding and electrostatic bridging elicit chromosome condensation.** (A) Swollen chromosomes were titrated with PEG 10,000 at concentrations ranging from 0 to 20% weight/volume. The normalized degree of condensation averaged over  $n = 372$  chromosomes is plotted with respect to one minus the thermodynamic activity of water (lower abscissa) and the concentration (% w/v) of PEG 10,000 (upper abscissa). Note that the relation between water activity and PEG concentration is nonlinear. (B) Decondensed chromosomes were titrated with chicken egg lysozyme (black), catalytically inactive tobacco etch virus (TEV) protease (red), and bovine serum albumin (BSA; blue). The normalized degree of condensation was determined by averaging over  $n = 497$ ,  $n = 551$ , and  $n = 772$  chromosomes respectively. Error bars for (A) and (B) denote  $\pm 1\sigma$ . (C) Dependence of the apparent microscopic dissociation constant ( $K_d$ ) on protein isoelectric point (pI). The data are fit by a straight line with  $r^2 = 0.995$ . (D) Comparison of response sensitivity by superposition of best-fit condensation profiles. The normalized degree of condensation is plotted with respect to logarithmic concentration, normalized by the  $EC_{50}$  of each agent.

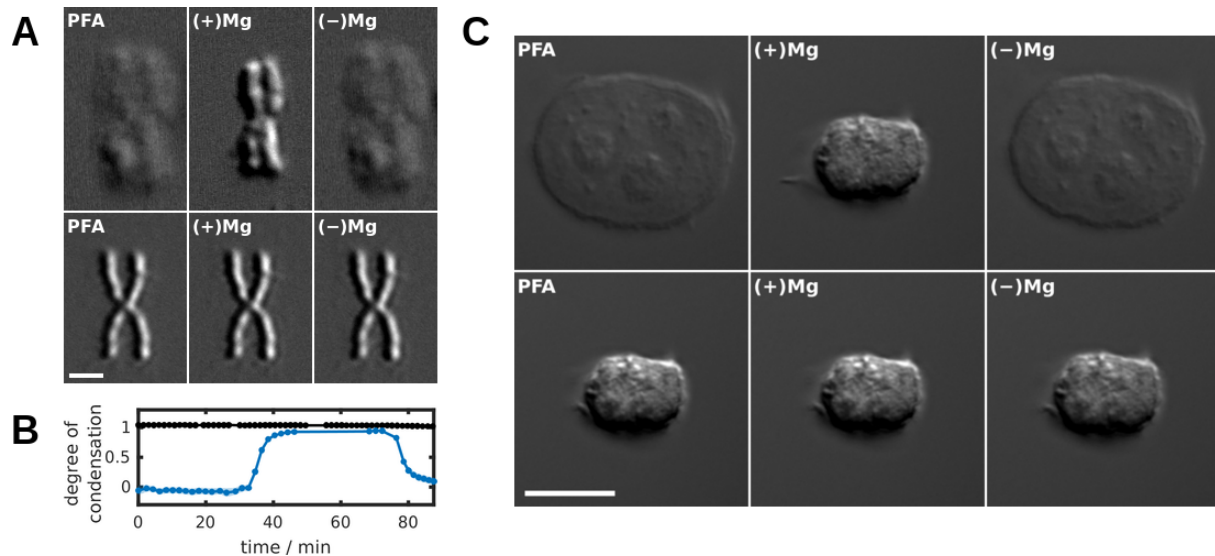

Figure 6: **Relevance to chromosome condensation-decondensation *in nucleio*.** (A) *Top*: Decondensed chromosomes cross-linked with 1% paraformaldehyde (PFA) in 5 mM HEPES (pH 7.5), 2 mM KCl (left) retained the ability to undergo condensation (middle) and decondensation (right). *Bottom*: Conversely, condensed chromosomes cross-linked with 1% PFA in 5 mM HEPES (pH 7.5), 2 mM KCl, 10 mM MgCl<sub>2</sub> (left) lost the ability to decondense (right). Scale bar: 2  $\mu$ m. (B) Quantification of the behavior shown in panel (A) for chromosomes cross-linked in condensed (black) and decondensed (blue) states. Chromosomes were exposed to 1% PFA for thirty minutes. After washing to remove PFA, the chromosomes were immersed in condensing solution (5 mM HEPES [pH 7.5], 2 mM KCl, 10 mM MgCl<sub>2</sub>) followed by decondensing solution (5 mM HEPES [pH 7.5], 2 mM KCl). (C) *Top*: Decondensed nuclei cross-linked with 1% PFA in 5 mM HEPES (pH 7.5), 2 mM KCl (left) retained the ability to undergo condensation (middle) and decondensation (right). *Bottom*: Conversely, condensed nuclei cross-linked with 1% PFA in 5 mM HEPES (pH 7.5), 2 mM KCl, 10 mM MgCl<sub>2</sub> (left) lost the ability to decondense (right). Scale bar: 10  $\mu$ m.

## 772 **Supplementary Materials**

773 **Materials and Methods**

774 **Supplementary Text**

775 **Figures S1-S7**

776 **Movie S1**

777 **References (81–97)**

## 778 **Materials and Methods**

779 **Chromosome purification** HeLa S3 suspension cells were grown in Minimal Essential Medium  
780 supplemented with 10% newborn calf serum, and adherent H2B-GFP HeLa cells (81) were  
781 grown in Dulbecco's Modified Eagle Medium containing 7.5% fetal bovine serum. Cells  
782 were grown at 37 °C in a 5% CO<sub>2</sub> atmosphere, and were arrested in mitosis by treatment  
783 with 100 ng/mL colcemid for 16 h (mitotic index ~0.6). Mitotic chromosomes were purified  
784 according to a protocol derived from the polyamine-based purification method of Lewis and  
785 Laemmli (2). Specifically, arrested cells were harvested by centrifuging at 1,000 g for 10' at  
786 room temperature and then resuspended in one tenth of the culture volume of a solution consist-  
787 ing of 7.5 mM Tris-HCl (pH 7.5), 40 mM KCl, 1 mM EDTA, 0.375 mM spermidine, 0.15 mM  
788 spermine, 1% thiodiethanol (v/v), and protease inhibitors (1 mM benzamidine, 100 μM leu-  
789 peptin, 10 μM pepstatin A, 1 mM phenylmethylsulfonyl fluoride). Cells were permitted to  
790 swell at room temperature for 10', and were subsequently pelleted (600 g for 6'), after which  
791 the supernatant was discarded. The cell pellet was resuspended in 10 mL of lysis buffer (twice  
792 concentrated swelling buffer supplemented with 0.1% [w/v] digitonin), and lysis was achieved  
793 by 12 strokes of a loose-fitting pestle. The lysate was loaded onto a 3 x 10 mL discontinuous  
794 gradient of sucrose (15%, 50%, 80% w/v) in a buffer consisting of 5 mM Tris-HCl (pH 7.5),

795 2 mM KCl, 2 mM EDTA, 0.375 mM spermidine, 1% thiodiethanol (v/v), 0.1% lauryldimethy-  
796 lamine oxide (w/v), and protease inhibitors, and then spun at 1,500 g for 45'. The chromosomes  
797 at the 50-80% interface were diluted to 40 mL with 88% Percoll in the previous buffer supple-  
798 mented with spermidine and spermine to final concentrations of 2 mM and 0.8 mM, respectively,  
799 and centrifuged at 45,000 g for 20'. The chromosomes, which formed a diffuse band near the  
800 bottom of the tube, were recovered and washed with a solution consisting of 5 mM Tris-HCl  
801 (pH 7.5), 2 mM KCl, and 2 mM EDTA, pelleted at 3,000 g for 10', and finally resuspended in  
802 a solution comprising 5 mM Tris-HCl (pH 7.5), 2 mM KCl, and 0.01% (w/v) sodium azide.

803 **Nuclei purification** HeLa S3 cells were washed with PBS and resuspended in ice-cold hypo-  
804 tonic buffer (10 mM HEPES-KOH [pH 7.5], 25 mM KCl, 2 mM MgCl<sub>2</sub>, 1 mM dithiothreitol,  
805 and protease inhibitors), centrifuged, and resuspended in ten volumes of the previous buffer.  
806 The cells were left on ice for 1 h and subsequently Dounce-homogenized using a loose-fitting  
807 pestle. Sucrose was added to the lysate to a final concentration of 250 mM. The nuclei were  
808 pelleted (1,000 g, 10'), washed once more in ten volumes of a similar buffer (10 mM HEPES-  
809 KOH [pH 7.5], 25 mM KCl, 2 mM MgCl<sub>2</sub>, 250 mM sucrose), resuspended in that buffer to a  
810 numerical concentration of 10<sup>6</sup> nuclei per microliter, and stored under liquid nitrogen. Thawed  
811 nuclear suspension was diluted 10-fold in 10 mM Tris (pH 7.5), 25 mM KCl, 2 mM MgCl<sub>2</sub>, and  
812 settled onto mPEG-AEPTES-derivatized coverslips for perfusion studies.

813 **Coverslip derivatization** Coverslips of 40 mm diameter and 170 ± 5 μm thickness (Paul  
814 Marienfeld, GmbH) were washed in a 2% (v/v) alkaline detergent solution (Mucosol, Schülke)  
815 for 30' in a bath sonicator. They were subsequently washed five times in 18.2 MΩ · cm  
816 (Milli-Q) water and sonicated for an additional 5' in Milli-Q water before being immersed  
817 in spectrophotometry-grade acetone (Photrex, J.T. Baker) and allowed to dry at room temper-  
818 ature. A silanol layer was produced by exposing the coverslips to air plasma (Harrick Plasma

819 PDC-32G, set to high power) for 5' and allowed to sit for 15', following which derivatization  
820 commenced by dipping in acetone and then immersing for 10 s in acetone supplemented with  
821 2% (v/v) 3-(2-aminoethylamino)propyltriethoxysilane (AEPTES, Gelest, Inc.). Following two  
822 additional acetone washes, the coverslips were dried on a hot plate set to 170°C for 10' and  
823 bath-sonicated in absolute ethanol for 10'. After washing extensively with water, they were  
824 finally dipped in acetone and allowed to dry before being stored at room temperature under vac-  
825 uum. A layer of PEG was applied by diluting mPEG-succinimidyl valerate (mPEG-SVA, MW  
826 5,000, Laysan Bio, Inc.) to 0.1 mg/mL in 100 mM potassium perborate (pH 8.4), and laying  
827 AEPTES-derivatized coverslips on a 100  $\mu$ L drop of that solution for 2 h. Coverslips were then  
828 rinsed five times with Milli-Q water, and allowed to dry before being stored under vacuum.

829 **Widefield microscopy** Chromosomes (0.08  $A_{260}$  units) were adsorbed to amine-functionalized  
830 coverslips, mounted in an FCS2 perfusion chamber (Bioptechs), allowed to settle for 1 h at room  
831 temperature, and washed with 5 mM Tris-HCl (pH 7.5) and 2 mM KCl delivered from a Har-  
832 vard Apparatus 11 Plus syringe pump at a flow rate of 50  $\mu$ L/min. The chamber was mounted  
833 in a K-stage adapter (160 x 110 mm) and loaded on a Nikon Eclipse-TI inverted microscope  
834 equipped with a Plan-Apo-TIRF, 100x, NA 1.49, oil-immersion objective. Micrographs were  
835 collected on an Andor Neo sCMOS camera with a 2560x2160-pixel sensor (6.5  $\mu$ m pixel size).  
836 For each time point, a z-stack comprising 20 to 40 Nyquist-sampled slices was collected using  
837 a piezoelectric z-drive. Buffer exchange was performed at flow rates not exceeding 500  $\mu$ L/min  
838 and adjustments to the flow rate were graduated to avoid deleterious shear gradients. We note  
839 that our experimental system allows for precise specification of the free concentration of ligand  
840 ( $[L]_{\text{free}}$ ), which is convenient for the study of associative processes. All solutions were made us-  
841 ing a base of 5 mM Tris-HCl (pH 7.5) and 2 mM KCl, with the exception of those employed for  
842 the pH and ionic strength titrations. For the pH titration, Tris-HCl was replaced by 5 mM con-

843 concentrations of the following buffers: glycine-HCl (for the pH range 2.5–3.5), potassium acetate  
844 (pH 3.75–5.75), PIPES-KOH (pH 6.0–7.0), and glycine-KOH (for pH greater than 8.5). For  
845 the ionic strength titration, solutions of KCl were prepared in argon-saturated water to exclude  
846 atmospheric carbon dioxide. PEG concentrations (Figure 5A) were expressed in terms of the  
847 corresponding thermodynamic activity of water using published measurements of density and  
848 activity (82–84). Lyophilized proteins (BSA [Calbiochem], hen egg white lysozyme [Sigma-  
849 Millipore]) were diluted in 5 mM Tris (pH 7.5), 2 mM KCl. TEV protease (C151A mutant),  
850 lysozyme, and BSA solutions were dialyzed overnight against 5 mM Tris, 2 mM KCl, pH 7.5  
851 to remove any trace of salt present in excess in the lyophilizate.

852 **Condensation profile determination** Determination of condensation profiles from DIC mi-  
853 crographs was accomplished in multiple steps. Single chromosomes were windowed within  
854 fields of chromosomes, affording regions of interest (“ROIs”). The focal plane for each ROI  
855 z-stack was determined using the variance of Tenenbaum’s gradient (85), which we found to  
856 be among the most robust functions for focusing DIC z-stacks from a library of focus mea-  
857 sures (86). ROI focal planes were then subjected to morphological determination of chro-  
858 mosome area using the following procedure: firstly, micrographs were low-pass filtered by  
859 convolution with a Gaussian kernel; secondly, contrast was enhanced by contrast-limited adap-  
860 tive histogram equalization (87); thirdly, edge detection was performed using the Canny algo-  
861 rithm (88); fourthly, short, perimeter-adjacent edges were pruned with an efficiency related to  
862 the proximity thereof to the ROI perimeter; fifthly, the image was closed with a disk-shaped  
863 structuring element and local minima eliminated by a flood-fill operation; sixthly, the image  
864 was opened with a smaller structuring element than the one used for closing, the purpose of  
865 which was to prune spurs; seventhly, area opening was performed to remove elements with sub-  
866 threshold connectivity; eighthly, the convex hull of the segmented foreground was computed;



867 and finally, the convex hull was smoothed with reference to the underlying micrograph by an  
868 active contour algorithm (89). The areas computed for each chromosome were internally nor-  
869 malized with respect to the areas computed from two calibration points collected for each data  
870 set, namely 0 and 375  $\mu\text{M}$  spermidine in 5 mM Tris-HCl (pH 7.5), 2 mM KCl. By this normal-  
871 ization procedure, the degree of condensation was assigned to be 0 or 1 in the presence of 0 or  
872 375  $\mu\text{M}$  spermidine, respectively; this measurement calibration allowed for the comparison of  
873 condensation profiles from different experiments. We note that this definition of the degree of  
874 condensation is related nonlinearly to density. Areas computed by this procedure agreed well  
875 with areas determined by manually delineating chromosome contours (Figure S3). By means of  
876 nonlinear least-squares regression, the normalized areas could be fit by the Hill equation, yield-  
877 ing estimates of the apparent dissociation constant and the Hill coefficient. Error bars displayed  
878 in plots of condensation profiles denote  $\pm 1\sigma$  (i.e., one standard deviation in either direction,  
879 centered about the mean value), and logarithms noted in such plots are of decimal base. The  
880 charge at pH 7.5 of methylamine, putrescine, spermidine, and spermine were computed using  
881 published pKa values for the amine moieties (90, 91).

882 **Chromosome volume determination** For the determination of chromosome volume, cover-  
883 slips were further passivated by coating with bovine serum albumin (BSA) to weaken surface  
884 contacts that may constrain the accessible range of chromosome volume. Z-stacks of chromo-  
885 somes were collected on a Zeiss LSM880 laser scanning confocal microscope equipped with  
886 an AiryScan detector while perfusing solutions containing 10 nM Sytox Green, well below  
887 the concentration observed to induce condensation (Figure 2A). Excitation light (488 nm) was  
888 provided by an argon laser directed through a 63 $\times$ , NA 1.4 PlanApochromat oil-immersion ob-  
889 jective lens, and rastered across the sample at a zoom setting of 1.8. Emitted light was collected  
890 at twice the Nyquist frequency (AiryScan super-resolution mode) by a 32-element gallium ar-

891 senide phosphide compound detector placed in the conjugate plane, and deconvolved in Zen  
892 software (Zeiss) using a Wiener filter setting of 6.0. The AiryScan detector was calibrated us-  
893 ing 0.1  $\mu\text{m}$  TetraSpeck fluorescent beads (Life Technologies). Two approaches were then used  
894 to measure chromosomal volume from deconvolved z-stacks; the first method involved segmen-  
895 tation by an Otsu threshold, and the second refined the Otsu mask by applying the Chan-Vese  
896 active contour algorithm with a mild contraction bias. Volumes computed by the first method  
897 were slightly larger than those by the latter, but the volumetric ratio (the measurement of inter-  
898 est), was similar for both.

## 899 **Supplementary Text**

900 We adapted a classical mean-field theory of gel swelling (24) for the prediction of chromosome  
901 swelling profiles. In addition to the assumption of a weak-screening limit, we further assumed  
902 additive independence of the contributions to the system's free energy, negligible contribution  
903 of mobile ions to the system's volume, and inter-phase activity coefficient ratios of unity. These  
904 approximations are justified under dilute conditions, for which the predictive accuracy of the  
905 model is expected to be greatest. We also ignored dependence of the Flory-Huggins parameter  
906 on ionic strength as well as any effects related to surface adsorption (i.e., the swelling process  
907 was regarded as unconstrained). The equilibrium state minimizes the free energy of the system,  
908 or, equivalently, results in zero net pressure, which is expressed by

$$\pi = \pi_{\text{mix}} + \pi_{\text{el}} + \pi_{\text{ion}} = 0. \quad (1)$$

909 The mixing term is modeled by Flory-Huggins solution theory, giving

$$\pi_{\text{mix}} = -kT/a^3 [\ln(1 - \phi) + \phi + \chi\phi^2], \quad (2)$$

910 where  $k$  is the Boltzmann constant,  $T$  is the absolute temperature,  $a^3$  is the volume of an element  
911 of the lattice in terms of which the theory is formulated,  $\phi$  is the polymer volume fraction  
912 (the volume fraction of solvent being  $1 - \phi$ ), and  $\chi$  is the Flory-Huggins parameter, which  
913 characterizes the energetics of the mixing process. The Flory-Huggins parameter is commonly  
914 expanded to first order in the polymer volume fraction ( $\chi = \chi_0 + \chi_1\phi$ ), a practice that was  
915 adopted herein.

916 To account for finite chain extensibility, the elastic term was taken to be that for a network  
917 of Langevin chains (92, 93):

$$\pi_{\text{el}} = \frac{kT}{a^3} \frac{v_1}{v_2} \frac{\phi_0}{N_x} \left[ \frac{1}{2} \left( \frac{\phi}{\phi_0} \right) - \frac{N_x^{1/2}}{3} \left( \frac{\phi}{\phi_0} \right)^{2/3} \mathcal{L}^{-1} \left( N_x^{-1/2} \left( \frac{\phi}{\phi_0} \right)^{-1/3} \right) \right], \quad (3)$$

918 where  $\mathcal{L}^{-1}$  denotes the inverse Langevin function,  $v_1$  the molar volume of solvent,  $v_2$  the molar  
919 volume of a statistical chain segment,  $N_x$  the degree of polymerization (i.e., the number of chain  
920 segments between cross-linking points), and  $\phi_0$  the volume fraction of the gel in its reference  
921 state, in which chains assume ideal conformations.

The ion osmotic pressure was approximated by the van't Hoff formula

$$\pi_{\text{ion}} = kT \sum_i c_i - c_i^*,$$

922 where  $c_i$  and  $c_i^*$  denote the concentrations of the  $i^{\text{th}}$  ionic species in the gel phase and the  
923 reservoir, respectively. The external concentrations are subject to experimental control and  
924 the internal concentrations are determined by Donnan equilibrium, which has a long history of  
925 application to the problem of polyelectrolyte gel swelling (24, 25, 94–96). Acid-dissociation and  
926 counterion-association reactions involving the gel's ionizable groups were taken into account  
927 when calculating the fixed charge of the gel.

With these considerations in mind, the ion osmotic pressure and the electroneutrality constraint can be formulated in terms of the Donnan ratio  $\lambda$  in a manner that is readily extensible to arbitrary solution contexts. The ion osmotic pressure is described by

$$\begin{aligned}
 \frac{\pi_{\text{ion}}}{kT} &= \nu_+ c_s^* \left[ (\lambda^{-z_+} - 1) - \frac{z_+}{z_-} (\lambda^{-z_-} - 1) \right] \\
 &+ \sum_l \nu_{l+} c_l^* \left[ (\lambda^{-z_{l+}} - 1) - \frac{z_{l+}}{z_{l-}} (\lambda^{-z_{l-}} - 1) \right] \\
 &+ \sum_{\alpha} \left( \frac{c_{\alpha}^* \cdot K_{a,\alpha}}{c_{\text{H}^+}^* + K_{a,\alpha}} \right) [\lambda + \lambda^{-1} - 2] \\
 &+ \sum_{\beta} \left( \frac{c_{\beta}^* \cdot K_{a,\beta}^{-1}}{c_{\text{H}^+}^{*-1} + K_{a,\beta}^{-1}} \right) [\lambda + \lambda^{-1} - 2] \\
 &+ c_{\text{H}^+}^* \left[ (\lambda^{-1} - 1) - \frac{1}{z_1} (\lambda^{-z_1} - 1) \right] \\
 &+ \frac{K_w}{c_{\text{H}^+}^*} \left[ (\lambda - 1) - \frac{1}{z_1} (\lambda^{-z_1} - 1) \right], \tag{4}
 \end{aligned}$$

while the electroneutrality equation is given by

$$\begin{aligned}
 \sum_i z_i c_i &= z_+ \nu_+ c_s^* (\lambda^{-z_+} - \lambda^{-z_-}) \\
 &+ \sum_l z_{l+} \nu_{l+} c_l^* (\lambda^{-z_{l+}} - \lambda^{-z_{l-}}) \\
 &+ \sum_{\alpha} \left( \frac{c_{\alpha}^* \cdot K_{a,\alpha}}{c_{\text{H}^+}^* + K_{a,\alpha}} \right) (\lambda^{-1} - \lambda) \\
 &+ \sum_{\beta} \left( \frac{c_{\beta}^* \cdot K_{a,\beta}^{-1}}{c_{\text{H}^+}^{*-1} + K_{a,\beta}^{-1}} \right) (\lambda^{-1} - \lambda) \\
 &+ c_{\text{H}^+}^* (\lambda^{-1} - \lambda^{-z_1}) + \frac{K_w}{c_{\text{H}^+}^*} (\lambda^{-z_1} - \lambda) \\
 &+ \frac{z_2 \nu_1 \phi}{a^3 \nu_2 \left[ 1 + \lambda^{-1} \left( \frac{c_{\text{H}^+}^*}{K_a} + \frac{z_+ \nu_+ c_s^*}{K_D} \right) \right]} = 0, \tag{5}
 \end{aligned}$$

928 where the reservoir concentration of the titrated salt (composed of  $\nu_+$  cations of valence  $z_+$  and  
929  $\nu_-$  anions of valence  $z_-$  per formula unit) is denoted by  $c_s^*$ . Background solutes are included  
930 in the summations over ionic compounds apart from the titrated salt (index  $\iota$ ), acids (index  $\alpha$ ),  
931 and bases (index  $\beta$ ). Ionic compounds comprise cations of valence  $z_{\iota+}$  and anions of valence  
932  $z_{\iota-}$  represented in formula units with stoichiometric coefficients of  $\nu_{\iota+}$  and  $\nu_{\iota-}$ . Monoprotic  
933 buffers with neutral acidic forms (having acid dissociation constants  $K_{a,\alpha}$ ) or neutral basic  
934 forms (having conjugate acid dissociation constants  $K_{a,\beta}$ ) are present at concentrations of  $c_\alpha^*$   
935 and  $c_\beta^*$ , respectively. Hydronium and hydroxide are present at concentration of  $c_{H^+}^*$  and  $c_{OH^-}^*$   
936 (which are linked according to  $K_w$ , the autoionization constant of water), and the pH is set by  
937 an appropriate quantity of strong acid or base whose counterion bears an algebraic charge of  
938  $z_1$ . Network strands consist of monomers bearing a mean charge of  $z_2$  elementary units upon  
939 full dissociation. The association reactions of ionized groups with protons and counterions  
940 are governed by an acid dissociation constant  $K_a$  and a counterion dissociation constant  $K_D$ ,  
941 respectively.

942 The equation of state for the gel is therefore determined by simultaneous nonlinear equa-  
943 tions, the numerical solution of which yields theoretical swelling profiles such as those depicted  
944 in Figures 3C and 3I.

945 Experimental data were fit to predictions from Equations 1–5 by a Monte-Carlo-guided  
946 random walk over the parameter space of the model. Free parameters included  $\phi_0$ ,  $N_x$ ,  $\nu_2$ ,  
947  $z_2$ ,  $\chi_0$ ,  $chi_1$ ,  $K_a$ , and  $K_D$ , the latter of which was parameterized as a linear function of the  
948 counterion charge ( $K_D = b_0 + b_1 z_+$ ). Data used for model refinement included the condensation  
949 profiles obtained for methylamine, putrescine, spermine, and KCl. The data for spermidine were  
950 omitted during model refinement. Mean chi-squared values ( $\chi^2/n$ ) were computed according  
951 to

$$\frac{\chi^2}{n} = \frac{1}{n} \sum_{i=1}^n \left( \frac{y_i - f(c_i; \vec{\theta})}{\sigma_i} \right)^2, \quad (6)$$

952 where  $y_i$  is the observed degree of condensation at concentration  $c_i$  with associated measure-  
953 ment error  $\sigma_i$ , and  $f(c_i; \vec{\theta})$  is the predicted degree of condensation at concentration  $c_i$  under  
954 parameterization  $\vec{\theta} = [\phi_0, N_x, v_2, z_2, \chi_0, \chi_1, K_a, b_0, b_1]$ .

## 955 **Supplementary Figures**

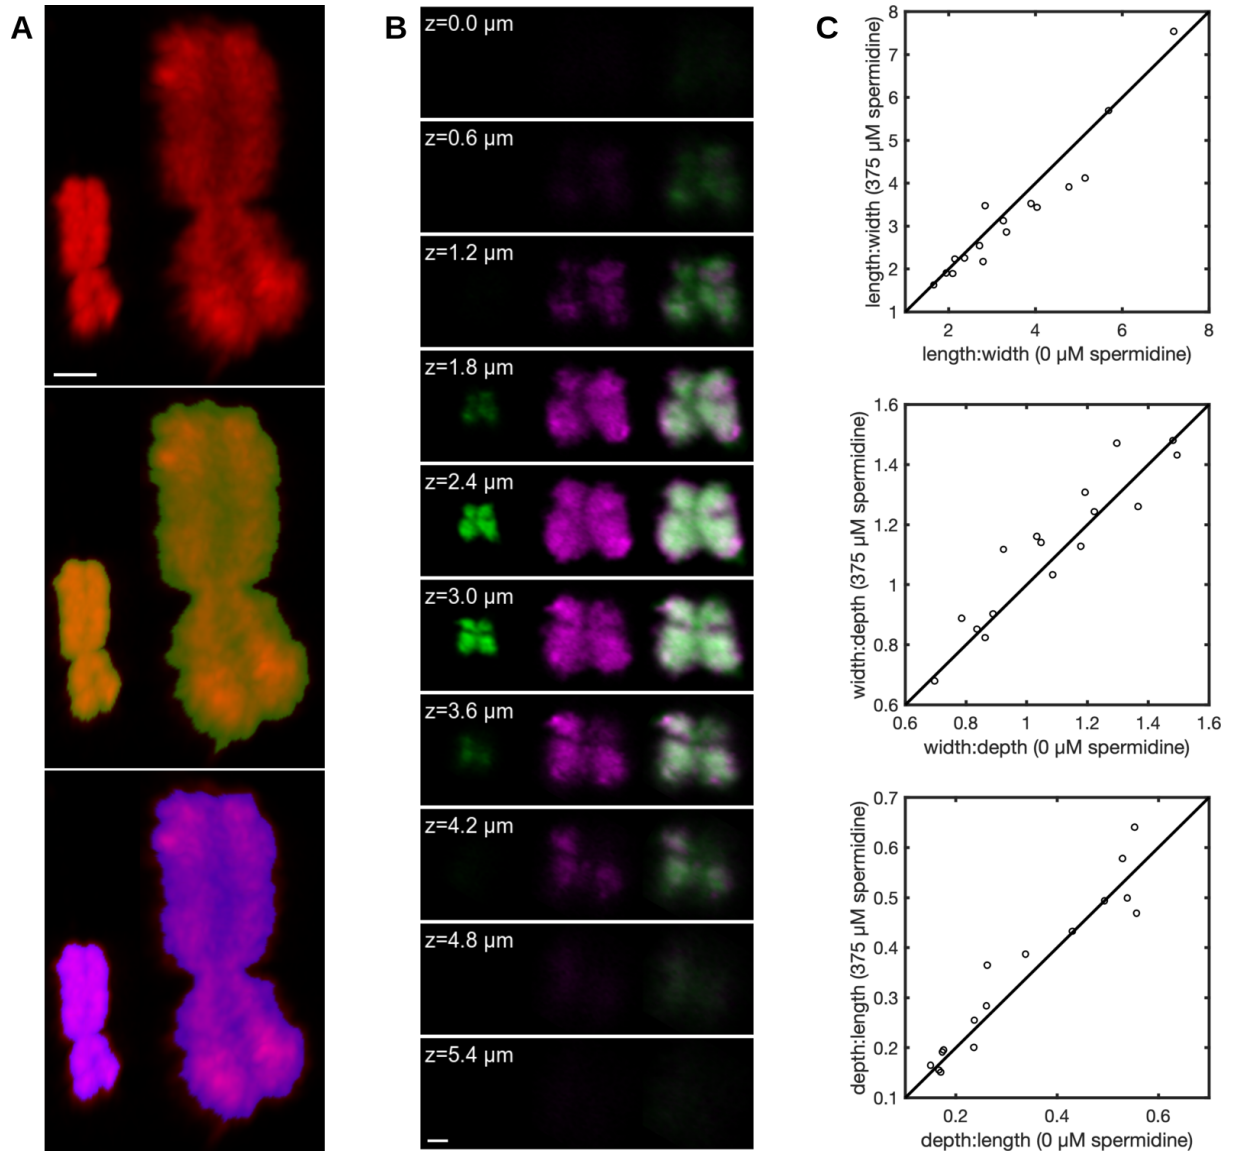

(Caption on following page.)

**Figure S1: Three-dimensional analysis of chromosome morphology and condensation behavior.**

(A) Estimation of chromosome volume from z-stacks of Sytox Green-stained chromosomes (top; cf. Figure 1B) acquired on a laser-scanning confocal microscope (Zeiss LSM880) in the presence or absence of 375  $\mu\text{M}$  spermidine. Chromosome volume was determined by means of an Otsu threshold alone (green mask, center) or in combination with an energy-minimizing active contour algorithm with a modest contraction bias (blue mask, bottom). The mean volume ratio between swollen and deswollen states for  $n = 54$  chromosomes was  $9.15 \pm 0.34$ -fold by the former method and  $9.95 \pm 0.43$ -fold by the latter (mean  $\pm$  S.E.M.). For visualization, Sytox Green was supplied at a concentration of 10 nM, significantly below levels observed to induce condensation (Figure 2A). Scale bar, 1  $\mu\text{m}$ . (B) Optical sections (rows) of a chromosome in condensed (left third of each panel; green) and decondensed (middle third of each panel; magenta) states. The condensed chromosome was expanded isotropically *in silico* by the linear scaling factor  $(V_d/V_c)^{1/3}$ , where  $V_d$  and  $V_c$  represent the volumes of the chromosome in decondensed (magenta) and condensed (green) states. The computationally expanded image of the condensed chromosome (right third of each panel; green) was brought into superposition with the decondensed state (right panels; magenta) by gradient-based optimization of the mean squared error of the three-dimensional images. A Pearson correlation coefficient was computed by pairwise comparison of pixel intensities throughout the superimposed three-dimensional volumes, shown in sections (right third of each panel), after normalization of intensities in each volume to the range [0,1]. The correlation coefficient for the chromosome shown here is 0.952. The spacing of the sections displayed is 0.6  $\mu\text{m}$ ; the scale bar represents 1  $\mu\text{m}$ . (C) Immobilized chromosomes were imaged in two states of condensation obtained by equilibration with solutions containing 5 mM Tris (pH 7.5), 2 mM KCl, and either 0  $\mu\text{M}$  or 375  $\mu\text{M}$  spermidine. Image stacks for  $n = 16$  chromosomes were subjected to measurements of chromosome length, width, and depth. Aspect ratios were computed along cyclically permuted dimensions. Points correspond to the ratio of the extent of the chromosomes along two spatial dimensions, as indicated by the axis labels, and lines describes the isotropic condition ( $y = x$ ). Clustering of the data points about the line  $y = x$  demonstrates the isotropic nature of condensation. *Top*: length:width ratios at 0  $\mu\text{M}$  and 375  $\mu\text{M}$  spermidine. *Middle*: width:depth ratios at 0  $\mu\text{M}$  and 375  $\mu\text{M}$  spermidine. *Bottom*: depth:length ratios at 0  $\mu\text{M}$  and 375  $\mu\text{M}$  spermidine.



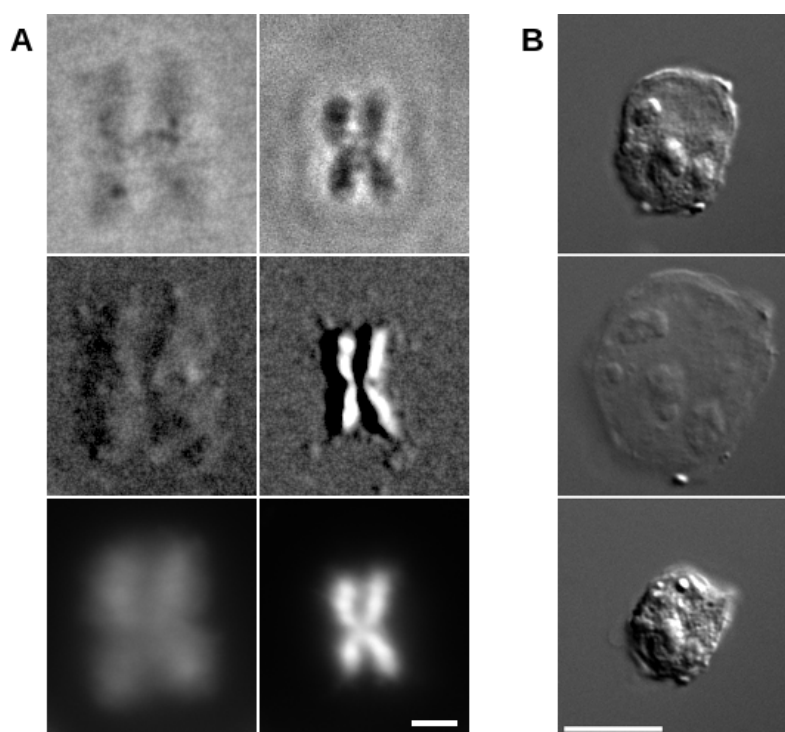

**Figure S2: Swelling behavior of chromosomes and nuclei.** (A) Correspondence between chromosome swelling/deswelling and chromatin decondensation/recondensation. A chromosome adsorbed to an amine-functionalized coverslip was exposed to spermidine concentrations of 0  $\mu\text{M}$  (left) and 375  $\mu\text{M}$  (right), corresponding to decondensed and condensed states of chromatin, respectively, and imaged by Zernike phase contrast (top), DIC (middle), and H2B-GFP fluorescence (bottom). The distribution of chromatin, represented by H2B-GFP fluorescence, mirrors changes in the specimen's optical path length (phase contrast) or a spatial derivative thereof (DIC). Scale bar, 2  $\mu\text{m}$ . (B) Nuclei swell and deswell under similar conditions to those for chromosomes. Purified HeLa cell nuclei were deposited on an amine-functionalized surface and imaged using DIC optics. Initially, the nuclei were placed in a solution consisting of 10 mM Tris-HCl (pH 7.5), 25 mM KCl, and 2 mM  $\text{MgCl}_2$  (top). They were swollen by flowing 5 mM Tris-HCl (pH 7.5) with 2 mM KCl (middle), and then deswollen by flowing the same buffer supplemented with 375  $\mu\text{M}$  spermidine (bottom). Scale bar, 10  $\mu\text{m}$ .

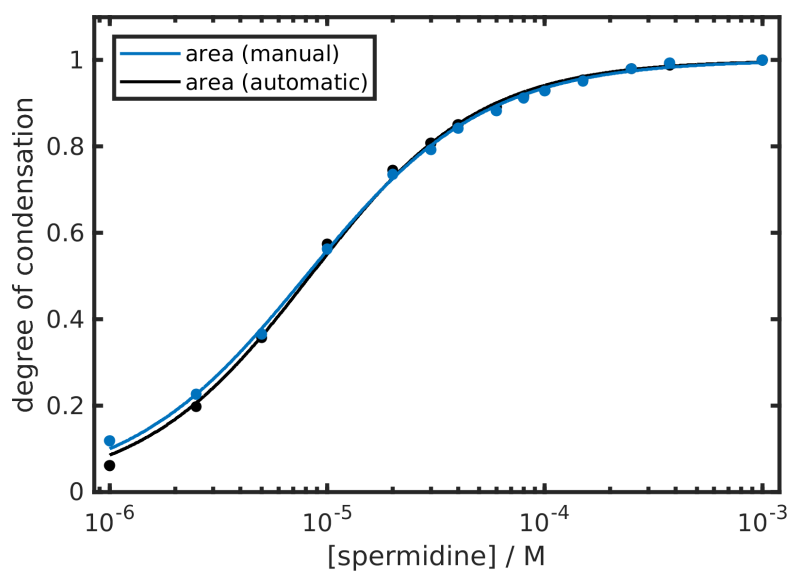

Figure S3: **Validation of computational analysis of chromosome morphology.** To validate the segmentation routine, images of chromosomes titrated with spermidine were segmented manually (black) and automatically (blue). The results of automatic segmentation shown here are also displayed as the black curve in Figure 2B.

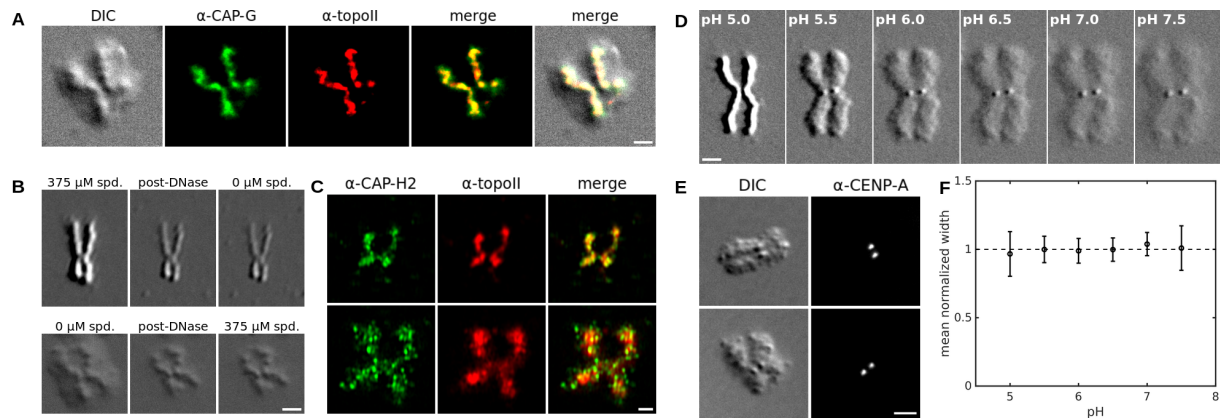

**Figure S4: Direct observation of scaffold and kinetochores by chromosome decondensation.** (A) Differential interference contrast image of a decondensed chromosome (left). Immunofluorescence (IF) with anti-hCAP-G (stained with Alexa Fluor 488 [green]) and anti-hTOP2A (topoisomerase II $\alpha$ , coupled to Alexa Fluor 647 [red]) shows colocalization of putative scaffold components with the central filament revealed by decondensation (three-way merge in right panel). Scale bar, 2  $\mu$ m. The DIC and merged images are reproduced in Figure 3G. (B) The central filament is resistant to DNase digestion when examined in a condensed (upper panels) or in a decondensed (lower panels) state. The initial (undigested) state is shown in the left panels. The filaments resulting from digestion (middle panels) remain unchanged (right panels) when the condensing activity of the milieu is adjusted (from high to low [top] or *vice versa* [bottom]). (C) The scaffold contracts in the presence (375  $\mu$ M, upper panels) and expands in the absence (0  $\mu$ M, lower panels) of spermidine. (D) Kinetochores, recognizable as metacentric dots, are made visible by decondensation; they do not swell. (E) Identification of the metacentric dots as kinetochores by comparison of DIC and IF images using anti-CENP-A antibody coupled to Alexa Fluor 647. Two examples are shown. (F) The normalized mean diameter of 16 kinetochores is plotted as a function of the solution pH: kinetochore size remains constant during chromosome decondensation.

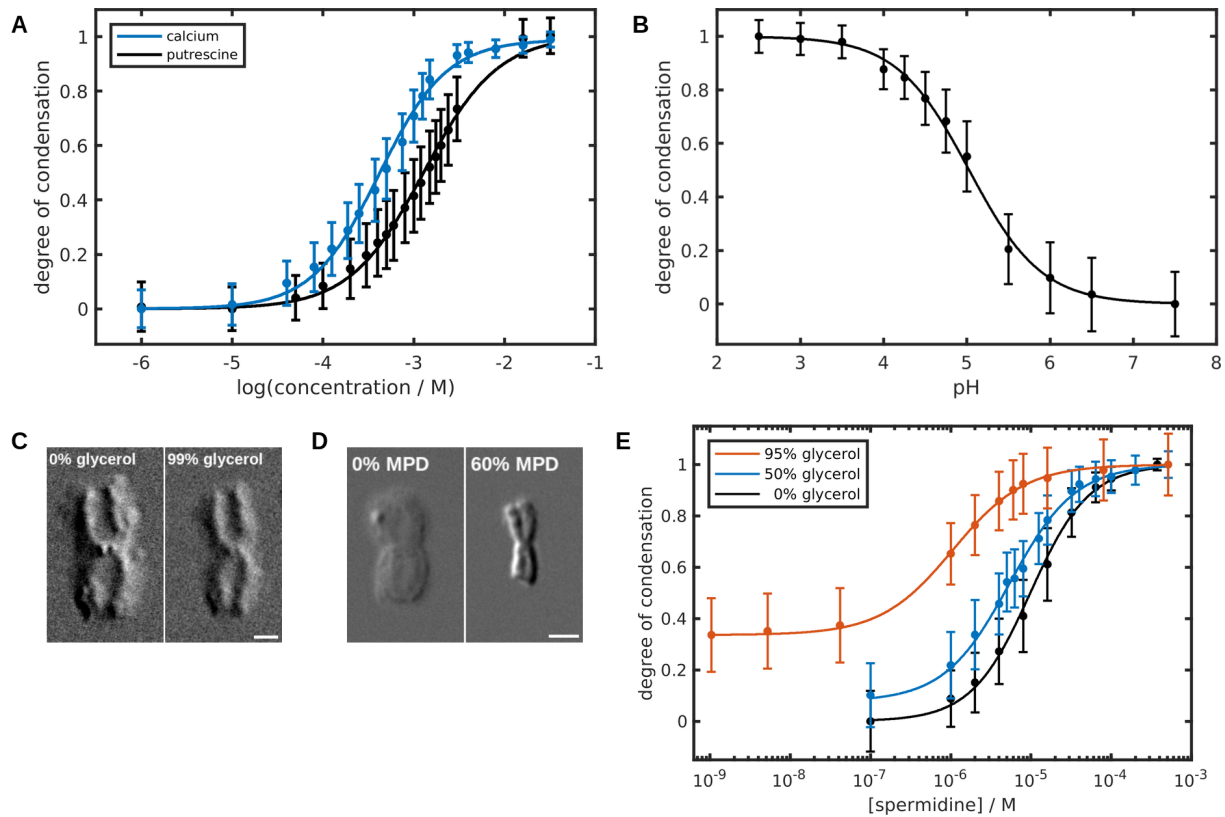

**Figure S5: Validation of predictions from polyelectrolyte gel theory: pH and solvent effects.** (A) Condensation profiles for chromosomes titrated with putrescine (black; data from Figure 3A) or calcium chloride (blue), indicating the existence of ion-specific effects. (B) The degree of condensation is governed by the fractional dissociation of ionizable groups intrinsic to chromatin. Chromosomes were condensed by stepwise reduction of the pH from 7.5 to 2.5. The normalized degree of condensation, averaged for  $n = 205$  chromosomes and fit to the Hill model, is plotted as a function of the solution pH. (C) Chromosomes exposed to 0% (left) or 99% (right) glycerol, and imaged by DIC (indicated percentages are volume/volume). The negligible increase in contrast reflects both partial condensation and the elevated background refractive index ( $n \approx 1.47$  for 99% glycerol compared to  $n \approx 1.33$  for water). (D) Chromosomes exposed to 0% (left) or 60% (right) 2-methyl-2,4-pentandiol (MPD), and imaged by DIC (indicated percentages are volume/volume). Note that the dielectric constants for pure glycerol and MPD at 298 K are  $\epsilon = 42.5$  and  $\epsilon = 25.1$  (97), respectively, compared to  $\epsilon = 78.3$  for water. The degree of condensation (and evidently the Flory-Huggins parameter for the chromatin-solvent system) increases inversely with the dielectric constant of the solvent. Scale bars for panels C and D represent  $2 \mu\text{m}$ . (E) Condensation profiles obtained by titrating spermidine in the presence of different concentrations of glycerol show that glycerol potentiates the effect of spermidine. Curves represent averages of  $n = 367$  (0% glycerol),  $n = 188$  (50% glycerol), and  $n = 223$  (95% glycerol) chromosomes. The black curve (0% glycerol) is also displayed in Figure 3A.

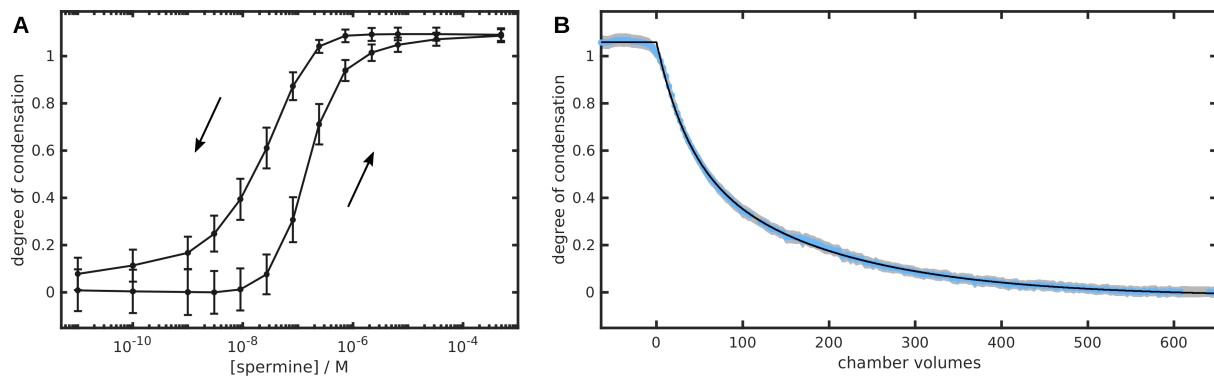

Figure S6: **Chromosome condensation is hysteretic.** (A) Hysteresis of chromosome condensation, observed by varying the concentration of spermine. Chromosomes were condensed by spermine and subsequently decondensed by its withdrawal (path indicated by the arrows), resulting in a hysteresis loop ( $n = 617$ ). The degree of condensation (normalized with respect to the degrees of condensation produced by solutions containing 0 and 375  $\mu$ M spermidine) is plotted as a function of the spermine concentration. During each step of decondensation, chromosomes were imaged after flowing at least 500 chamber volumes of solution. (B) Chromosomes condensed by treatment with 4 mM spermine were decondensed by flowing a solution consisting of 5 mM Tris (pH 7.5) and 2 mM KCl. The degree of condensation of  $n = 150$  chromosomes (blue points; gray shading denotes the 99% confidence interval) was measured as a function of the volume of buffer administered, normalized by the volume of the flow chamber. The black curve represents a biexponential fit of the data.

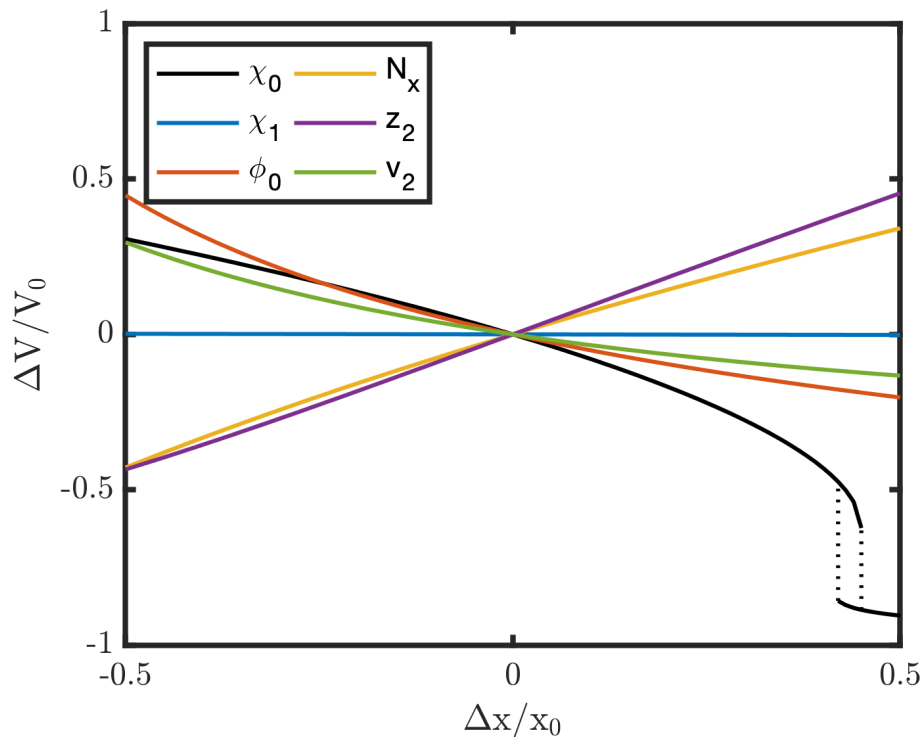

Figure S7: **Effect of varying model parameters on gel volume.** Effect of variation of individual model parameters ( $x$ ) on gel volume ( $V$ ) at physiologic salt (125 mM monovalent salt). The ordinate represents the difference in gel volume relative to that of the starting volume ( $\Delta V/V_0$ ), and the abscissa represents the relative difference of parameters ( $\Delta x/x_0$ ), which are shown in the legend ( $\chi_0$ ,  $\chi_1$ ,  $\phi_0$ ,  $N_x$ ,  $z_2$ , and  $v_2$ ). The initial values of the parameters and volume are those for a gel parameterized as in Figure 3C (solid lines). A VPT is predicted to occur upon raising  $\chi_0$ , indicated by the dotted lines that form a hysteresis loop. Our model does not consider coupling between  $\chi$  and fixed charge density ( $z_2$ ).

956 **Movie S1: Liberation of the scaffold by DNase digestion of a decondensed chromosome.**  
957 Differential interference contrast time-lapse recording of a decondensed chromosome exposed  
958 to deoxyribonuclease I.
